# Supplementary material for: Absence of a human ortholog of rodent Kupffer cell galactose-binding receptor encoded by the CLEC4f gene
Source: PubMed Central journal article supplement (PMC6422238; doi:10.1093/glycob/cwy113), 2019-01-11
Supplement: cwy113_supplemental_data.pdf [file cwy113_supplemental_data.pdf]

*Supplemental Data for*

Absence of a human ortholog of rodent Kupffer cell galactose-binding receptor  
encoded by the CLEC4f gene

Maureen E. Taylor, Tom Snelling, David F. Smith, and Kurt Drickamer

Department of Life Sciences, Imperial College, London SW7 2AZ United Kingdom

Emory Comprehensive Glycomics Core, Emory University, Atlanta, GA 30322 United States

Contents

**Figure S1.** Alignment of all predicted CLEC4f protein sequences that include complete CRDs.

**Figure S2.** PCR primers for mouse CLEC4f cDNA.

**Figure S3.** PCR primers for cow CLEC4f cDNA.

**Figure S4.** PCR primers for human CLEC4F gene.

**Figure S5.** Sequence of codon-optimized cDNA for chimpanzee CLEC4f.

**Figure S6.** PCR primers for Rhesus monkey CLEC4F cDNA.

**Table SI.** Database information for CLEC4f genes examined.

**Table SII.** Glycan array screening of mouse CLEC4f protein on the Consortium for Function Glycomics array version 2.1.

**Table SIII.** Glycan array screening of cow CLEC4f protein on Consortium for the Function Glycomics array version 6.2.

**Table SIV.** Glycan array screening of chimpanzee CLEC4f protein on the Consortium for Function Glycomics array version 6.2.

**Figure S1.** Alignment of all predicted CLEC4f protein sequences that include complete CRDs. The C-terminal portions of the CRD sequences, which contain all of the residues in the sugar-binding site, are shown. For orientation, some of the highly conserved residues that form the framework of the CRD fold are highlighted in yellow. Residues that form the Ca<sup>2+</sup>-binding sites are highlighted in yellow. Residues that do not conform to the consensus sequence are shaded in magenta. The species corresponding to the left, as well as the sources of the sequences, are given in supplemental Table S1.

1 YFESHVKKSWHEAEQFCVSOGAHLASVASKEEQI RAFLVEVTGQAYYWI GLTDRGTEGSWCWTDGTPFNVTQNKTF WERNRPNWQHKGNGOTEDCVHI QOKWNDMTCDTPYQWVCKKPMGHGVA  
2 YFESHVKKSWHEAEQFCVSOGAHLASVASKEEQ--AFLVEVTGKAYYWI GLTDRGTEGSWCWTDGTPFNVAQNKTF WERNRPNWQHKGNGOTEDCVHI QOKWNDMTCDTPYQWVCKKPMGHGVA  
3 YFESHVKKSWHEAEQFCVSOGSHLASVASKEEQI RAFLVEVTGQAYYWI GLTDRGTEGSWCWTDGTPFNVAQNKTF WERNRPNWQHKGNGOTEDCVHI QOKWNDMTCDTPYQWVCKKPMGHGVA  
4 YFESHVKKSWHEAEQFCVSOGAHLASVASKEEQI RAFLVKVTGKAYYWI GLTDRGTEGSWRWTDGTPFNVAQNKTF WERNRPNWQHKGNGOTEDCVHI QOKWNDMTCDTPYQWVCKKPMGHGVA  
5 YFESRVKKSWHEAEQFCVSOGAHLASVASKEEQI RAFLVEVTGKAYYWI GLTDRGTEGSWRWTDGTPFNVAQNKTF WERNRPNWQHKGNGOTEDCVHI QOKWNDMTCDTPYQWVCKKPMGHGVA  
6 YFESRI KKSWEAEQFCVSOGAHLASVASKEEQI RAFLVEVTGKAYYWI GLTDRGTEGSWHWTDGTPFNATQNKAF WERNRPNWQHKGNGOTEDCVHI QOKWNDVTC DTPYQWVCKKPMGHGVA  
7 YFESSVKKSWHEAEQFCVSOGAHLASVASKEEQ--AFLVEFTSKVYYWI GLTDRGTEGSWRWTDGTPFNAAQNKAF WEKNOPDNWRHKGNGOTEDCVQI QOKWNDMTCDTPYQWVCKKPMGQOVA  
8 YFESSVKKSWHEAEQFCVSOGAHLASVASKEEQ--AFLVEFTSKVYYWI GLTDRGTEGSWRWTDGTPFNAAQNKAF WEKNOPDNWRHKGNGOTEDCVQI QOKWNDMTCDTPYQWVCKKPMGQOVA  
9 YFESSVKKSWHEAEQFCVSOGAHLASVASKEEQ--AFLVEFTSKVYYWI S L TDRGTEGSWRWTDGTPFNAAQNKAF WEKNOPDNWRHKGNGOTEDCVQI QOKWNDMTCDTPYQWVCKKPMGQOVA  
10 YFESSVKKSWHEAEQFCVSOGAHLASVASKEEQ--AFLVEFTSKVYYWI GLTDRGTEGSWRWTDGTPFNAAQNKAF WEKNOPDNWRHKGNGOTEDCVQI QOKWNDMTCDTPYQWVCKKPMGQOVA  
11 YFESSVKKSWSEAEQFCVSKGAHLASVASEEEQ--AFLVAFTGNAYYWI GLTDRGTEGFRWTDGTPFNATONREF WGNKOPDNWRHKGNGOTEDCVHI QOKWNDMNC DTPYQWVCKKPMGQOVA  
12 YFESSVKKSWSEAEQFCVSKGAHLASVASEEEQ--AFLVAFTGNAYYWI GLTDRGTEGFRWTDGTPFNAAARNREF WEKNOPDNWRHKGNGOTEDCVHI QOKWNDMNC DTPYQWVCKKPMGQOVA  
13 YFESSVKKSWSEAEQFCVSKGAHLASVASEEEQ--AFLVAFTGNAYYWI GLTDRGTEGFRWTDGTPFNAAQSKRF WEKNOPDNWRHKGNGOTEDCVHI QOKWNDMNC DTPYQWVCKKPMGQOVA  
14 YFESSVKKSWSEAEQFCVSKGAHLASVASEEEQ--AFLVAFTGNAYYWI GLTDRGTEGFRWTDGTPFNASRNQRF WERNOPDNWRHKGNGOTEDCVHI QOKWNDMNC DTPYQWVCKKPMGQOVA  
15 YFESRDKKPWREAEKFCVSOGAHLASVTSQEEQ--AFLVQTTSSGDHWI GLTDQGTEGI WRWVDGTPFNAAQSKRF WGNKOPDNWRHKGNGOTEDCVHVRQWVNDMA CGSSYPWVCKKSTGWSAARVG  
16 YFESRDKKPWQEAEEFCVSOGAHLASVTSQEEQ--AFLVQTTSSGDHWI GLTDQGTEGI WRWVDGTPFNAAQSKRF WAKNQP DNWRHKGNGOTEDCVHLRQWVNDMA CGSSYPWVCKKSTGWSAARVG  
17 YFESRDKKPWQEAEEFCVSOGAHLASVTSQEEQ--AFLVQTTSSGDHWI GLTDQGTEGI WRWVDGTPFNAAQSKRF WGNKOPDNWRHKGNGOTEDCVHLRQWVNDMA CGSSYPWVCKKSTGWSAARVG  
18 YFESRDKKSWHEAENFCVSOGAHLASVTSQEEQ--AFLVQI TNVADHWI GLTDQGTEGWRWVDGTPFNAAQSKRF WGNKOPDNWRHKGNGOTEDCVHLRQWVNDMA CGTAYNPWVCKKSTGWSAARVG  
19 YFESODEKSWHEAEKFCVTOGAHLASVTSQEEQ--AFLVQTTSSGDHWI GLTDQGTEGI WRWVDGTPFNAAQSKRF WAKNQP DNWRHKGNGOTEDCVHVRQWVNDMA CGTAYNPWVCKKSTGWSAARVG  
20 YFESHEKSWHEAENFCVSOGAHLASVTSQEEQ--EFLAKFTSNEYHWI GLTDHGI EGDWRWVDGTPFNAAQSKRF WGNKOPDNWRHKGNGOTEDCVHMRQWVNDMA CGAAYPWVCKKSTGQAVA  
21 YFESHEKSWHEAEEFCVSOGAHLASVTSQEEQ--AFLVKSTSTVYHWI GLTDQGMGWRWVDGTPFNAAQSKRF WAKNQP DNWRHKGNGOTEDCVHMQQWVNDMA LCGATYPWVCKKPI GOAVA  
22 YFESHEKSWHEAEEFCVSOGAHLASVTSQEEQSWI QDNYSTSTVYHWI GLTDQGMGWRWVDGTPFNAAQSKRF WGNKOPDNWRHKGNGOTEDCVHMQQWVNDMA CGAAYPWVCKKSI GOAAA  
23 YFESHEKSWHEAEEFCVSOGAHLASVTSQEEQ--AFLVKSTSTVYHWI GLTDRGLEGNWRWVDGTPFNAAQSKRF WGNKOPDNWRHKGNGOTEDCVHMQQWVNDMA CGAAYPWVCKKSTGQAAA  
24 YFESHVKKPWHEAEQFCVSOGAHLASVTSQEEQ--AFLVQFTSTSYHWI GLTDRGTEGSWRWTDGTPFNAAQSKRF WDKNQP DNWRHKGNGOTEDCVHI QOKWNDI NCNNSYQWVCKKKTGLAMA  
25 YFESHVKKPWHEAEQFCVSOGAHLASVTSQEEQ--AFLVQFTSSTYHWI GLTDRGTEGSWRWTDGTPFNAAQSKRF WGNKOPDNWRHKGNGOTEDCVHI QOKWNDI NCNNSYQWVCKKKTGLAMA  
26 YFESHVKKSWHEAERSVSKGAHLASVTSQEEQ--AFLVQFTSSTYHWI GLTDMGMEGWRWADGTQFNAAQSKRF WDRNQP DNWRHKGNGOTEDCVHLRSLWVNDMA CNSPYHWVCKKPMGQOVA  
27 YFESHVKKSWHEAERSVSKGAHLASVTSQEEQ--AFLVQFTSSTYHWI GLTDMGTEGWRWADGTQFNAAQSKRF WDKNQP DNWRHKGNGOTEDCVHLRSLWVNDMA CNSPYHWVCKKPMGQOVA  
28 YFESPI KKSWEAERSVSKGAHLASVTSQEEQ--AFLVQFTSSTYHWI GLTDMGTEGWRWADGTQFNAAQSKRF WGNKOPDNWRHKGNGOTEDCVHLRSLWVNDMA CNSPYHWVCKKPMGQOVA  
29 YFESHVKKSWNEAEQFCVSOGAHLASVTSQEEQ--EFLVHTSTMYHWI GLTDWGTEGWRWADGTQFNAAQSKRF WGNKOPDNWRHKGNGOTEDCVHMQQWVNDMA CGAAYPWVCKKSTGQAVA  
30 YFESHVKKSWHEAEQFCVSOGAHLASVTSQEEQ--AFLVQFTSSTYHWI GLTDSGTENWWRWVDGTPFNAAQSKRF WDKNQP DNWRHKGNGOTEDCVHMQQWVNDMA CKDSYHWVCKKPMGQOVA  
31 YFESQAKKTWYEAEEFCVSOGAHLASVTSQEEQ--AFMVQNTGAFYHWI GLTDSGTEGSWRWTDGTPFNAAQSKRF WGNKOPDNWRHKGNGOTEDCVHMQQWVNDMA CKQTFHHWVCKKSKGREVA  
32 YFESHVKKSWHEAEQFCVSRGAHLASVTSQEEQ--AFLVQFTSSTYHWI GLTDRGTEGSWRWTDGTPFNAAQSKRF WDKNQP DNWRHKGNGOTEDCVHI QOKWNDI SCNASYHWI CKKSTGQAVA  
33 YFESNI KKPWHEAEKFCVSOGAHLASVTSQEEQ--AFLVQFTSSTYHWI GLTDAGTEGWSWTDGTPFNAAQSKRF WDKNQP DNWRHKGNGOTEDCVHI QOKWNDI SCNASYHWI CKKSTGQAVA  
34 YFESHVKKSWHEAERFCVSOGAHLASVTSQEEQ--EFLVQFTSSTYHWI GLTDRGSEGSWRWADGTQFNAAQSKRF WDRNQP DNWRHKGNGOTEDCVHMQQWVNDMA CGAAYPWVCKKPMGQOVA  
35 YFESQVKKSWHEAEKFCVSOGAHLASVTSQEEQ--DFMVYFTSSAYHWI GLTDKDTGEGWRWVDGTPFNAAQSKRF WETNQP DNWRHKGNGOTEDCVQI QOKWNDI VCSASYPWVCKKPRDFI VA  
36 YFESSAKKTWQEAEEFCVSHGAHLASVTSQEEQ--TFLI QFTSSVYHWI GLTDHGTEGWRWTDGTAFFDRARSAF WAENOPDNWQHGI GQSEDCVQMQQWVNDI SCSTLCRWI CKKPMVQL  
37 YFESSAKKTWQEAEEFCVSHGAHLASVTSQEEQ--TFLI QFTSSVYHWI GLTDHGTEGWRWTDGTAFFDRARSAF WAXNQP DNWQHGI GQSEDCVQMQQWVNDI SCSTLCRWI CKKPMVQL  
38 YFESSAKKTWQEAEEFCVSHGAHLASVTSQEEQ--TFLI QFTSSVYHWI GLTDHGTEGWRWTDGTAFFDRARSAF WAENOPDNWQHGI GQSEDCVQMQQWVNDI SCSTLCRWI CKKPMVQL  
39 YFESSAKKTWQEAEEFCVSHGAHLASVTSQEEQ--AFLVQFTSSTYHWI GLTDRGTEGWRWTDGTAFFDRARSAF WAENOPDNWQHGI ERSQDCVQMQQWVNDI SCSTLSPGI CKKPVSQL  
40 YFESSAKKTWQEAEEFCVSHGAHLASVTSQEEQ--AFLVQFTSSTYHWI GLTDRGTEGWRWTDGTAFFDRARSAF WAENOPDNWQHGI DRSEDVQMQQWVNDI SCSTLSPWI CKKPVSQL  
41 YFESSAKKTWQEAEEFCVSHGAHLASVTSQEEQ--TFLI QFTSSVYHWI GLTDHGTEGWRWTDGTAFFDRARSAF WAENOPDNWQHGI GQSEDCVQMQQWVNDI SCSTLCRWI CKKPMVQL  
42 YFESSAKKTWQEAEEFCVSHGAHLASVTSQEEQ--TFLMFTSSVYHWI GLTDRGTEGWRWTDGTAFFDRARSAF WAENOPDNWQHGI GQSEDCVQMQQWVNDI SCSTLCRWI CKKPVSQL  
43 YFESSAKKTWQEAEEFCVSHGDHLASVTSQEEQ--AFLVQFTSSTYHWI GLTDRGTEGWRWTDGTAFFDRARSAF WAENOPDNWQHGI EWSQDCVQMQQWVNDI SCSTLSPWI CKKPVSQL  
44 YFESSAKKTWQEAEEFCVSHGAHLASVTSQEEQ--AFLVQFTSSTYHWI GLTDSDFQGFWRWADGTQFNAAQSKRF WDRNQP DNWRHKGNGOTEDCVHMQQWVNDMA CDRPQWVCKKPMGRM  
45 YFESSAKKTWQEAEEFCVSOGAHLASVTSQEEQ--AFLVQFTSSTYHWI GLTDSDFQGFWRWADGTQFNAAQSKRF WDRNQP DNWRHKGNGOTEDCVHMQQWVNDMA CDRPQWVCKKPMGRM  
46 YFESSAKKTWQEAEEFCVSOGAHLASVTSQEEQ--AFLI QFTSSTYHWI GLTDSDFQGFWRWADGTQFNAAQSKRF WDKNQP DNWRHKGNGOTEDCVHMQQWVNDMA CDRPQWVCKKPMGRM  
47 YFESSAKKTWQEAEEFCVSRGAHLASVTSQEEQ--AFLI QFTSSTYHWI GLTDSDFQGFWRWADGTQFNAAQSKRF WDKNQP DNWRHKGNGOTEDCVHMQQWVNDMA CDRPQWVCKKPMGRM  
48 YFESHVKKWQEAEEFCVSOGAHLASVTSQEEQ--AFLI QFTSSTYHWI GLTDSDFQGFWRWADGTQFNAAQSKRF WDKNQP DNWRHKGNGOTEDCVHMQQWVNDMA CDRPQWVCKKPMGRM  
49 YFESHAKKTWQEAEEFCVSOGAHLASVTSQEEQ--AFLI RFTSSTYHWI GLTDSDFQGFWRWADGTQFNAAQSKRF WDKNQP DNWRHKGNGOTEDCVHMQQWVNDMA CDRPQWVCKKPMGRM  
50 YFESHAKKTWQEAEEFCVSOGAHLASVTSQEEQ--AFLI RFTSSTYHWI GLTDSDFQGFWRWADGTQFNAAQSKRF WDKNQP DNWRHKGNGOTEDCVHMQQWVNDMA CDRPQWVCKKPMGRM  
51 YFESLAEKSWHDAEQFCVSOGAHLASVTSQEEQ--AFLMFTSTAYHWI GLTDWGTEGWRWADDTQFNAAQSKRF WDNQNP DNWRHKGNGOTEDCVHMQQWVNDMA CSALYHWVCKKPMAGV  
52 YFESLAEKSWHDAEQFCVSOGAHLASVTSQEEQ--AFLMFTSTAYHWI GLTDWGTEGWRWADDTQFNAAQSKRF WDNQNP DNWRHKGNGOTEDCVHMQQWVNDMA CSALYHWVCKKPMAGV  
53 YFESLAEKSWHDAEQFCVSOGAHLASVTSQEEQ--AFLMFTSTAYHWI GLTDWGTEGWRWADDTQFNAAQSKRF WDNQNP DNWRHKGNGOTEDCVHMQQWVNDMA CSALYHWVCKKPMAGV  
54 YFESI AKKSWHEAEQFCVSOGAHLASVTSQEEQ--AFLI QFTSTNYHWI GLTDRGTEGWRWADDTQFNAAQSKRF WDNQNP DNWRHKGNGOTEDCVHMQQWVNDMA CSALYHWVCKKPMAGV  
55 YFESSAKKTWQEAEEFCVSHGAHLASVTSQEEQ--AFLI QFTSSTYHWI GLTDRGTEGWRWTDGTPFNAAQSKRF WDNQNP DNWRHKGNGOTEDCVHMQQWVNDMA CSALCNIW CKTSVQGL  
56 YFESSAKKTWQEAEEFCVSOGAHLASVTSQEEQ--AFLVQFTSSTYHWI GLTDSGSEGI WRWTDGTPFNAAQSKRF WENOPDNWRHKGNGOTEDCVQI QOKWNDI SCSTLCRWI CKKPLDRM  
57 YFESHVKKSWHEAEQFCVSOGAHLASVTSQEEQ--EFLVKFTSTSHHWI GLTDRGTEGWRWTDGTPFNAAQSKRF WGNKOPDNWRHKGNGOTEDCVHI QOKWNDMHC DTPYHWVCKKPI NOHVA  
58 YFESHVKKSWHEAEQFCVSOGAHLASVTSQEEQ--EFLVKFTSTSHHWI GLTDRGTEGWRWTDGTPFNAAQSKRF WGNKOPDNWRHKGNGOTEDCVHI QOKWNDMHC DTPYHWVCKKPI NOHVA  
59 YFESHVKKSWHEAEQFCVSOGAHLASVTSQEEQ--EFLVKFTSTSHHWI GLTDRGTEGWRWTDGTPFNAAQSKRF WGNKOPDNWRHKGNGOTEDCVHI QOKWNDMHC DTPYHWVCKKPI NOHVA  
60 YFESHVKKSWHEAEQFCVSOGAHLASVTSQEEQ--EFLVKFTSTSHHWI GLTDRGTEGWRWTDGTPFNAAQSKRF WGNKOPDNWRHKGNGOTEDCVHI QOKWNDMHC DTPYHWVCKKPI NOHVA  
61 YFESHVKKSWHEAEQFCVSOGAHLASVTSQEEQ--EFLVKFTSTSHHWI GLTDRGTEGWRWTDGTPFNAAQSKRF WGNKOPDNWRHKGNGOTEDCVHI QOKWNDMHC DTPYHWVCKKPI NOHVA  
62 YFESHVKKSWHEAEQFCVSOGAHLASVTSQEEQ--AFLVQFTSSTYHWI GLTDGSEEGSWRWDGTPFNAAQSKRF WGNKOPDNWRHKGNGOTEDCVHI QOKWNDMHC DTPYHWVCKKPI NOHVA

63 YFFSHVKKSWHEAEQFCVSOGAHLASVTSEEEQ--AFLVRFSTSYHWI GLTDGSEEGSWHWVDGTPFNVAQSRFAF WGRNQP DNWKHWDGQTED CVHI EQKWNDMRC DTPYHWVC KKKPI SOHVA  
64 YFFSHVKKSWHEAEQFCVSOGAHLASVTSEEEQ--AFLVRFSTSYHWI GLTDRSEEGSWHWVDGTPFNVAQSRFAF WGRNQP DNWKHWDGQTED CVHI EQKWNDMRC DTPYHWVC KKKPI SOHVA  
65 YFFSHVKKSWHEAEQFCVSOGAHLASVTSEEEQ--AYLI KFTSTSYHWI GLTDSGKEGSRWVVDGTPFVSQTSTAF WGRNQP DNWQHGDGQTED CVHI EQKWNDMRC DTPYHWVC KKKPI SOHVA  
66 YFFSHVKKSWHEAEQFCVSOGAHLASVTSEEEQ--AYLI KFTSTSYHWI GLTDSGKEGSRWVVDGTPFVSQTSTAF WGRNQP DNWQHGDGQTED CVHI EQKWNDMRC DTPYHWVC KKKPI SOHVA  
67 YFFSHVKKSWHEAEQFCVSOGAHLASVTSEEEQ--AYLI KFTSTSYHWI GLTDSGKEGSRWVVDGTPFVSQTSTAF WGRNQP DNWQHGDGQTED CVHI EQKWNDMRC DTPYHWVC KKKPI SOHVA  
  
68 YFFSHVKKSWHEAEQFCVSOGAHLASVTSEEEQ--AFLTRFTSTSHHWI GLTDGGHEGVWRWADGTPFSAGRSPVFWGSHOPDNWQHEDGRTED CVHMQHKWNDMLC DTPYHWVC KKKPTGORVA  
69 YFFSHVKKSWHEAEQFCVSOGAHLASVTSEEEQ--AFLTRFTSTSHHWI GLTDGGHEGVWRWADGTPFSAGRSPVFWGSHOPDNWQHEDGRTED CVHMQHKWNDMLC DTPYHWVC KKKPTGORVA  
70 YFFSHVKKSWHEAEQFCVSOGAHLASVTSEEEQ--AFLTRFTSASHHWI GLTDRGHEGVWRWADGTPFSAGRSPVFWGSHOPDNWQHEDGRTED CVHMQHKWNDMLC DTPYHWVC KKKPTGOLVA  
71 YFFSHI KKSWEAEQFCVSOGAHLASVTSEEEQ--AFLVRFSTSYHWI GLTDRSEEGSWHWVDGTPFNVAQSRFAF WGRNQP DNWKHGDGQTED CVHI EQKWNDMRC DTPYHWI C KKKPI SOHVA  
72 YFFSYVKKSWHEAEQFCVSOGAHLASVTSEEEQ--AFLVKFTSTSHHWI GLTDSGKEGSRWVVDGTPFNVAQSRFAF WGRYQPDNWRSDGQTED CVHI EQKWNDI RC DTPYNNVC KKKPI SOHVA  
73 YFFSHVKKSWQEAQFCVSOGAHLASVTSAAEQ--AYLTFEFTFRSDYWI GLNDRGTEGFWRWI DGTFFNSARNRVF WNDNQP DNWQHNGQDEDC CVHVQOKWNDNN CNALYQWI C KKKPLSQGVA  
74 YFFSHVKKSWQEAQFCVSOGAHLASVTSAAEQ--AYLTFEFTFRSSNYWI GLNDRGTEGFWRWI DGTFFNSARSRVF WSDNQP DNWQHNGQDEDC CVHVQOKWNDNN CNALYQWI C KKKPLSQGVA  
75 YFFSHVKKSWQEAQFCVSOGAHLASVTSAAEQ--AYLTFEFTFRSSNYWI GLNDRGTEGFWRWI DGTFFNYARSRVF WNDNQP DNWQHNGQDEDC CVHVQOKWNDNN CNALYQWI C KKKPLSQGVA  
76 YFFSHVKKSWQEAQFCVSOGAHLASVTSAAEQ--EYLTKFTGTYLHWI GLTDSGNEGSWSWTDGTPFNFAHRSRAF WYDNQP DNWQHSDGQDEDC CVHMQKWNDS CKALFHWVC KKKPI SOAVA  
77 YFFSHAKKSWLEAEQFCVSOGAHLASVTSAAEQ--AYLTFEFTFRSSNYWI GLNDRGTEGFWRWI DGTFFNFARSRVF WYENQP DNWQHNGQDEDC CVHVQOKWNDNN CNLHQWVC KKKPI SOGVA  
78 YFFSGI KKSWHMAEQFCVSHGAHLASVTSEEEQ--EYLKFTSTFYHWI GLTDRGKEGAWRWDGTPFNVAQSRFAF WNDHQP DNWKHSDGQTED CVHI QKWNDMN CNSLYHWVC KKKPI SOGVV  
79 YFFSGI KKSWHMAEQFCVSHGAHLASVTSEEEQ--EYLKFTSTFYHWI GLTDRGKEGAWRWDGTPFNVAQSRFAF WNDHQP DNWKHSDGQTED CVHI QKWNDMN CNSLYHWVC KKKPI SOGVV  
80 YFFSDI KESWHMAEQFCVSHGAHLASVTSAAEQ--AYLVMFTSTSYHWI GLTDSGTEGTRWVVDGTPFDFAQSRGF WNHQP DNWRHKDQSEDC CVHI QKWNDMN CNSPYQWVC KKKPI S  
81 YFFSKVKKSWHEAEQFCVSOGAHLASVTSEEEQ--AYLKAFTSTTYHWI GLTDRGNEGSWRWVDGTPFNVAQSRFAF WENNQP DNWRHRDQSEDC CVQI QKWNDMN CNSPYHWVC KKKPV  
82 YFFSNDKKSWEAEQFCVSNGAHLASVTSAAEQ--AYLVQFMKNTYHWI GLTDSGSEGSWRWVDGTPFNVAQSRFAF WNDNQP DNWRHKDQSEDC CVHTQOKWNDMN CNSLYQWI C KKKPI SQDVA  
83 YFFSSDKKTWQEAQFCVSOGAHLASVTSAAEQ--AYLI KFTSTSYHWI GLNDRDREGTRWVVDGTPFDFAQSRGF WSHNQP DNWL - SGGQDEDC CVHI QKWNDI SCNLYHWVC KKKPSQGVA  
84 YFFSDVKKSWQEAQFCVSOGAHLASVTSKEEQ--KFLTQTTSDSYHWI GLTDRGTEGSRWVVDGTRFNDAARSKEF WDTNQP DNWRHSNGQVED CVHTQOKWNDMI CDALYPWI CEKTI AOGVA  
85 YFFSDVKKSWQEAQFCVSOGAHLASVTSKEEQ--KFLTQTTSDSYHWI GLTDRGTEGSRWVVDGTRFNDAARSKEF WDTNQP DNWRHSNGQVED CVHTQOKWNDMI CDALYPWI CEKTI AOGVA  
86 YFFSDVKKSWQEAQFCVSOGAHLASVTSKEEQ--KFLTQTTSDSYHWI GLTDRGTEGSRWVVDGTRFNDAARSKEF WDTNQP DNWRHSNGQVED CVHTQOKWNDMI CDALYPWI CEKTI AOGVA  
87 YFFSRI KKSWHAAERFCVSOGAHLASVTSEEEQ--EFLAETVSNYSYHWI GLTDMGTEGSRWVVDGTPFNVAQSRFAF WEKNQP DNWLNAKGTED CVHTQORWNDMD CDVLYPWVC KKKPI GOGAAEAGQSSEVTTTATSGTSLP  
88 YFFSHI KKSWEAEQFCVSOGAHLASVTSVEEQ--AFLVKFTQTSNHWI GLTDRGTEGFWRWVDGTPFNVAQSRGF WGRNQP DNWKHADGRTED CVQI QKWNDI FCDALYPWI C KKKPSG  
89 YFFSEAKKTWQDAENFCVSWGAHLASVTSEEEQ--AFLI TVI KDSYHWI GLTDQGTGEGVHWVTDRTPFNDAQSRKF WEPNQP DNWEHGEGRTEDC CVHTKOKWNDI YCNNTTYQWVC KKS SGGGTTGPS  
90 YFFSDTKKSWNEAEKFCVSNKAHLTSMTSVEEQ--NFLTKYTKNSFYWI GLTDSGTEGSRWVVDGTPFNVAQSRKF WSKNQP DNWRNKDGKFED CVHMQOE WNDI NCDNLYQWI C KKKPSGQHVTVG  
91 YFFSHVKKSWHEAEQFCASHGAHLASVTSEEEQ--AFLROFTSSLYHWI GLTDSGMEGSRWVVDGTPFSSSRSTTF WDKNQP DNWRHSNGQAEQ CVOMLQKWNDMD CGASFHWVC KKKPKGGQS  
92 YFFSEDKKSWHQAEQFCVSOGTHLASVTSVEEQ--AFLAQTSSRYHWI GLTDGGTEGSRWVVDGTPFSSSTQSRQL WDNANQP DNWRHSNGHYED CVHI QKWNDMD CDASYHWVC KKMPTGLGAA  
93 YFFSHVKKTWNEAEQFCVSLGAHLASVTSKEEQ--AFLI KFTSDLYHWI GLTDRGTEGSRWVVDGTPYNAQSRQF WEKNQP DNWRHSNGQTED CVHTQEKWNDI ECGSSLHWVC KKKPMGQDVA  
94 YFFSRVKKSWHEAEQFCVFOGAHLASVTSEEEQ--AFLTETTSTSYHWI GLTDRGTEGSRWVVDGTPFNVAQSRFAF WDRNQP DNWQHNGQTED CVHVQOKWNDMA C DTPYHWVC KKKPI DOGVA  
95 YFFSNEKKSWEAEQFCVSERAHLASVTSEEEQ--TFLRKSTDTFYHWI GLTDRGTEGSRWVVDGTPFNVAQSRKF WGRNQP DNWLHNGQTED CVHMQOMWNDI LC DTPYHWVC KKKPI QOSVA  
96 YFFSNDKKYWNEAEKFCVSOGAHLASVTSEEEQ--AFLTKSTSTSYHWI GLTDRGMEGSRWVVDGTPFNVAQSRFAF WDKNQP DNWLHNGQTED CVHI QOMWNDMY CDAAYHWVC KKKPI GOGVI  
97 YFFSHDKKSWNEAEQFCVSOGAHLASVTSEEEQ--AFLTSTSTSYHWI GLTDRGMEGSRWVVDGTPFNVAQSRFAF WDKNQP DNWLHNGQTED CVHI QKWNDI RCDI VYHWVC KKKPI SOGVS  
98 YFFSDDKKSWHGAEQFCVSOGAHLASVTSAGEQ--KFLTSTSTSYHWI GLTDRGREGSRWVVDGTPFNVAQSRGF WDPNQP DNWQHNGQTED CVHVEQWNDMD CGATYQWVC KKKPVAQGLA  
99 YFFSHDKKSWNEAEAF CVSOGAHLASVTSEEEQ--TFLTKFTSTSYHWI GLTDKGTEGSRWVVDGTPFNVAQSRFAF WENNQP DNWRHNGQTED CVHI QKWNDMD CSAAYHWVC KKKSMGQVA  
100 YFFSKAQKSWDEAEQFCVSNDSHLASVTSEEEQ--EFLKRTNGVYHWI GLTDKGTEDVWRWVDGTPYNGAKSKGF WNRNQP DNWNNGI QDD CVHFMEKWNDI VCHRFPWI C KKKVWPAK

**Figure S2.** PCR primers for mouse CLEC4f cDNA. PCR primers are indicated in blue. The red sequence shows the bacterial ompA protein secretion signal sequence that is appended to the expressed fragment in the expression vector.

MetLys  
tctagataacgaggcgcaaaaaatgaaa

LysThrAl al l eAl al l eAl aVal Al aLeuAl aGl yPheAl aThrVal Al aGl nAl aGl y  
aagacagctatcgcgattgcagtgccactggctgggttctcgctaccgtagcgcaggccggc  
5' -ggccggc  
mKCRF1

Gl nGl yPheLeuGl nHi sSerMetAspAsn l eSerAl aGl n l eGl nThrVal ArgAsp  
caggccttctccagcacagtatggacaacattagtgtcagatccagaccgtgagagat  
caggccttctccagcacagtatggacaac-3'

Gl yMetGl uArgAl aGl yGl uLysMetAsnSerLeuLysLysGl uLeuGl uThrLeuThr  
ggtatggaaggcctgggtgaaaagatgaactcgttaaagaaagagctggaaacactcact

Al aGl nThrGl nLysAl aAsnGl yHi sLeuGl uGl nThrAspAl aGl n l eGl nGl yLeu  
gctcagactcaaaaggcaaaatggccacctggagcagacagatgcccagatccagggtta

LysAl aGl uLeuLysSerThrSerSerLeuAsnSerArg l eGl uVal Val AsnGl yGl n  
aaagctgagctgaaaagcaccagtctcttgaactcccggattgaggtggtcaatggccaa

MetLysAspAl aSerArgGl uLeuGl nThrLeuArgArgAspLeuSerAspVal SerAl a  
atgaaagatgccagcagagagttacagaccctgagaaggacctgagtgatgtctcagct

LeuLysSerAsnVal Gl nMetLeuGl nSerAsnLeuGl nArgAl aLysThrGl uMetGl n  
ttgaagtccaatgtccagatgtacagagcaatctcagagggccaagacagagatgca

ThrLeuLysAl aAspLeuGl nAl aThrLysAl aLeuThrAl aLys l eGl nGl yGl uGl n  
actttgaaggcagatctgcaggcgaccaagccctcactgccaagattcagggggagcag

AsnArgLeuGl yAl aLeuGl nGl uAl aVal Al aAl aGl nLysGl nGl uGl nLysThrGl n  
aatcgcctggggggccctgcaggaagccgtggctgcacagaagcaggagcagaagactcag

AsnGl nVal LeuGl nLeu l eAl aGl nAsnTrpLysTyrPheAsnGl yAsnPheTyrTyr  
aatcaggtctccagctgatcgcgcagaactggaagtacttcaatggaaacttttattac

PheSerArgAspLysLysProTrpArgGl uAl aGl uLysPheCysThrSerGl nGl yAl a  
tttctcgtgacaagaagccgtggcgggaggctgagaagttctgtacgtcccaggggagcg

Hi sLeuAl aSerVal ThrSerGl nGl uGl uGl nAl aPheLeuVal Gl nThrThrSerSer  
cacctggcttcggtgacctctcaggaggaacaggcatctctggtacagactacaagttct

Gl yAspHi sTrp l eGl yLeuThrAspGl nGl yThrGl uGl y l eTrpArgTrpVal Asp  
gggaccattggattgggctcactgaccagggcacagagggcatctggcgctgggtagat

Gl yThrProPheAsnAsnAl aGl nSerLysGl yPheTrpGl yLysAsnGl nProAspAsn  
gggacaccattcaacaatgcccagagcaaaagggttttgggggaaaaatcagcctgacaac

TrpArgHi sArgAsnGl yGl uArgGl uAspCysVal Hi sVal ArgGl nGl nTrpAsnAsp  
tgagacataggaacggagagcgagaagactgtgttcacgtccggcagcagtggaatgac

MetAl aCysGl ySerSerTyrProTrpVal CysLysLysSerThrGl yTrpSerAl aAl a  
atggcctgtggaatcctctaccctgggtgtgcaagaagtccacaggggtggtctgcggcc  
3' -accagacgcccg

ArgVal Gl y\*\*\*  
agagtaggctagagctga  
tctcatccgatctcgactgcggccgc-5'  
mKCRr1

**Figure S4.** PCR primers for human CLEC4F gene. The genomic region shown includes the CLEC4f gene, from *Homo sapiens* chromosome 2, which is the complement to bases 70827723-70806153 in primary assembly GRCH38.p7. Exons are highlighted in green, with splice donor and acceptor sites indicated in red. PCR primers are shown in blue.

ggctgggatgatggggctgagaactgacgggaaggtgctaattgggaagaggaagaaaatagggcagatgg  
 gtatctgggagcctctaggggaggggcccactggggcggttctgcagagtcaggcagggaggaggaa  
 gagctgggaggggtggcaggagcatataagtgtgggtgtctcagctttgcttccactgccattggtccac

gggacggcccttccaggagccagtggctgggagcagtgctggaggatcaaggaagcagagatggacgggtg Exon 1  
 5' -ggatcaaggaagcagagatggacg-3' hKCRf1

I uAl aVal ArgPheCysThrAspAsnGI nCysVal SerProHi sProGI nG  
 aggcagtcggcttctgcacagataaccagtggtgtctccctgcaccccaaggtgagaaaaactggggcccc

agctcttggccagtgagggagtagcctgcctgtctcttggccctctgccataaggcagcttattgctgtc  
 ttattgctctccccagaccctgtccttggggatgcagacctggcaagagaaaaggggatgaactttgaat  
 tcagatggctcctggcttggaaatcccggctctgcacactgagctggctcctgtgaggcctcccctccttct  
 ttcttctttcattcaaacctacacttttggttgctctgtgctctgtgcccaggttctgtgcccctgtgaccac  
 caagcctccttgagatttggagatcgggtggctcgggtctcagagctcctcagctctgtgtgctaccat  
 atccacatctagctctgggtgaacagcccaaggtgtttgtcttcttctccataaccacctgcatgataa  
 gcatggcaggagtattcatccccattagacaaccaggaaacagaatcagagaggctgtgtctcagcctg

cacagaccctcttaccttgcacagcaccctctcaccttggacactgccttctcccctgcagaggtaggac Exon 2  
 I uVal Asp

SerVal AI aMetAI aProAI aAl aProLysI I eProArgLeuVal GI nAl aThrProAI aPheMetAI aV  
 tctgtggcaatggctcctgcagcccccaagataaccgaggctcgttcaggctaccccgcatttatggctg

al ThrLeuVal PheSerLeuVal ThrLeuPheVal Val V  
 tgaccttgggtcttctctcttggtagctctcttggtagtgggttaagccccagggtgacccaaatctcactaa

cttctctcctttcagcacaaagtccccagggggcccagatgcacactctctgggcctctctgctcccag  
 aaagatcattccacctccagctccaggcccaagccacagcttccctgggaacagataaaggccactgtcc  
 aagggggagcctcccagaactgaggttcatgagggaaaccctgggagggctcttctgctctatctccccg  
 gttctggaactctacctctgtgtgggacagcgtatcctcccaggctcagggtggggaattgctgacctg

gaaaaatggaatgtctcagttcaacagcagacaagacctgttccgaagcctgtgcaagccgtaattctgg Exon 3  
 5' -gacctgttccgaagcctgtgcaag-3' 3' -gacc hKCRf2

I yAspAsnI I eThrGI yHi sLeuProPheGI uProAsnA  
 gagacaacattactgggcatttaccttttgaacccaacaggtgagtagccacagtggggtggggtgcaga  
 ctctgttgaatgaccgta-5' hKCRr1

gggaactggggccttcagatgctcagaccctaggatgagcttctctcctggtagcctctgaccactgaa  
 gggctccaccatcctcacagaaagagataatttttaaaaacacagttttattgaggtctaattggtgtat  
 atatttaagcatacaaatctgttaagttttgacataatgtgtgtgcccctgaaaccaatcaccacaatcatc  
 atcacatagctatcctcctcaccccaagtttcttgggctctttgtaattccttctcctcctcctcctc  
 tctcatcccctgggagccacagatctacttggctgtaactatagattagtttgcttttctagagttta  
 tagataagagatcatagagtatgtactctttgttcttggctagtcagtgatgtgcaaatatttctct  
 cagctgtgacttgtcttgtcaattctcctaacaagatttttaattttgatagtctaatttatcattttatt  
 tctgttatggattattctcatgatctcgtatgtgagaaatctgcctaatccaaggctacaaagatgttct  
 ctttgtttctggaaattgtacagtttttagtttttagttttgtttttgtttttgacggagctctcgctc  
 tctcctgcctcagcctctggagtagctaggactacaggcgcccggccaccagcctggctaattttttgt  
 attttagtagagacggagtttaccggttagccaggatggctcagatcccctgacctcgtgatctgcc  
 cacctcagcctcccgaaggtctgggattacaggcgtgagccaccatgccagcccggtttttagttttac  
 atttaggctctgcctcattttagttaattattgtataatgggtgtgaaattgatgttccagcaccattt  
 gttgaaaaagttatctttctccgtgaattgcctttgcacctttgttgaattcgatgttccatattgtgtg  
 ggggtctacttccgtattctccattctgtcgcattgattgtttgtctatctttacaagcagaaatctt  
 gactgaactcccagctaccttgaaggtcccctctcttaccttagcacagtaactgaggtctcacacatct  
 acataggcagtgcatgagaaatagtagatggatgctccagaaagggccttggcattcttgggtttttctc  
 cctattcctgaggggagactggaatcagaaggggatcatggatgtgtgagattaggcttagtcatgag  
 gtgaacaaaggatgcttagcaggaccagaggttagatgcatgtgaggttgggtgggaaagacctgcagatta  
 aaggggctgtggggtctccttcaacgaccccagcgcaaggccttttactcaggtttcctgtatcctcaa  
 ctgttctgtagggaccttggccatgtaacactgggggtgctggctctttaaaggccatctcagctga  
 ggtccagtgtagttaccctggagggcatggcatgcctctatcatagcccctgttgattgaacagggctact

cctcccagcacacctatTTTTGTTTTGTTTTCTGTTTTCTTTCCTTTGTGTTTTCTTCTCCATGGAATTTGCC  
atcataaaacttatgTTTGTGGTGGTTTTATCAAGTAACAATGGTGAATCAAGAGGCTCTATGCTTGGT  
gtacaaatataatgtaggactaaccacaggctTTATTCATACCTATTTCTTTCCATAATGACCCATCT  
gtggTgaaatTCCAGTAAAATAAACTTCAACAGCTCTAAATGATAAAATCAGTTACTTTCAAGTTGAGC  
aattataacgacaaaataatccaagcctTACCAGCATGACTCCTGGTGGCAGCTGGCTTACAGCAGGCAA  
gcatTTCAATCCTTCTGACCCCTTCAATTTGTGTGTAACAGTGAATTAGATCTTTGTTCTTGGCCACAT  
TCTCAGGTGGACCGTCCCCAGGCTCTGGGTGGCTGTGTGACCAGGAGGGTGTCTGGGGGAGCACTGAGGG  
ctgtgcagtaccatttccctTGGAAATGTTAGAAACACTCTGGGTGGCCATAAAAATGCTACCCACAT

aatggcctctTTGGCTGCCTTCTTCACTTCTCCCTCCAGATCATCACCACTTTGGCAGGGAGGCAGAA Exon 4

MetArgGI uLeuI eGI nThrPheLysGI yHi sMetGI uAsnSerSerAI aTrpVal Val GI ul I eGI nM  
atgCgagagcttatccagacattTAAAGGCCACATGGAGAATTCAGTGCCTGGGTAGTAGAAATCCAGA

etLeuLysCysArgVal AspAsnVal AsnSerGI nLeuGI nVal LeuGI yAspHi sLeuGI yAsnThrAs  
tGTTGAAGTGCAGAGTGGACAATGTCAATTCGCAGCTCCAGGTGCTCGGTGATCATCTGGGAAACACCAA

nAl aAspI eGI nMetVal LysGI yVal LeuLysAspAI aThrThrLeuSerLeuGI nThrGI nMetLeu  
tGCTGACATCCAGATGGTAAAAGGAGTTCTAAAGGATGCCACTACATTGAGTTTGACACACAGATGTTA

ArgSerSerLeuGI uGI yThrAsnAI aGI ul I eGI nArgLeuLysGI uAspLeuGI uLysAI aAspAI aL  
aggagtTCCCTGGAGGGAACCAATGCTGAGATCCAGAGGCTCAAGGAAGACCTGAAAAGGCAGATGCTT

5' -ggaagacctgaaaaggcagatgc-3'  
hKCRF3

euThrPheGI nThrLeuAsnPheLeuLysSerSerLeuGI uAsnThrSerI I eGI uLeuHi sVal LeuSe  
taactTTCCAGACGCTGAATTTCTTAAAAGCAGTTTAGAAAACACCAGCATGAGCTCCACGTGCTAAG

rArgGI yLeuGI uAsnAI aAsnSerGI ul I eGI nMetLeuAsnAI aSerLeuGI uThrAI aAsnThrGI n  
cagaggcttagaaaatgcaaacTCTGAAATTCAGATGTTGAATGCCAGTTTGGAAACGGCAAAATCCAG

Al aGI nLeuAI aAsnSerSerLeuLysAsnAI aAsnAI aGI ul I eTyrVal LeuArgGI yHi sLeuAspS  
gctcagttagccaatagcagttTAAAGAACGCTAATGCTGAGATCTATGTTTTGAGAGGCCATCTAGATA

erVal AsnAspLeuArgThrGI nAsnGI nVal LeuArgAsnSerLeuGI uGI yAl aAsnAI aGI ul I eGI  
gtgtcaatgactTgaggaccagaaccaggTTTTAAGAAATAGTTTGAAGGAGCCAATGCTGAGATCCA

5' -atgctgagatcca  
hKCRF4

nGI yLeuLysGI uAsnLeuGI nAsnThrAsnAI aLeuAsnSerGI nThrGI nAl aPheI I eLysSerSer  
gggactaaaggaaaattTGCAGAACACAAATGCTTTAAACTCCCAGACCCAGGCTTTATAAAAAGCAGT

gggactaaagg-3' 3' -gagggctctgggtccggaaaattt-5'  
hKCRr3

PheAspAsnThrSerAI aGI ul I eGI nPheLeuArgGI yHi sLeuGI uArgAI aGI yAspGI ul I eHi sV  
TTTGACAACACTAGTGTGAGATCCAGTTCTTAAGAGGTCATTTGGAAAGAGCTGGTGTGAAATCACG

al LeuLysArgAspLeuLysMetVal ThrAI aGI nThrGI nLysAI aAsnGI yArgLeuAspGI nThrAs  
tGTTAAAAGGGATTTGAAAATGGTCCAGCCAGACCCAAAAGCAAATGGCCGCTGGACCAGACAGA

pThrGI nI I eGI nVal PheLysSerGI uMetGI uAsnVal AsnThrLeuAsnAI aGI nI I eGI nVal Leu  
tactcagattcaggtattcaagtCAGAGATGGAAAATGTGAATACCTTAAATGCCAGATTCAGGTCTTA

AsnGI yHi sMetLysAsnAI aSerArgGI ul I eGI nThrLeuLysGI nGI yMetLysAsnAI aSerAI aL  
aatggtcatatgaaaaatGCCAGCAGAGAGATACAGACCCTAAAACAAGGAATGAAGAATGCTTACGCCT

euThrSerGI nThrGI nMetLeuAspSerAsnLeuGI nLysAI aSerAI aGI ul I eGI nArgLeuArgGI  
taactTCCAGACCCAGATGTTAGACAGCAATCTGCAGAAGGCCAGTCCGAGATCCAGAGGTTAAGAGG

yAspLeuGI uAsnThrLysAI aLeuThrMetGI ul I eGI nGI nGI uGI nSerArgLeuLysThrLeuHi s  
ggatctagagaacaccaaagctctaaccatggaaaatccagcaggagcagagtcgctgaagaccctccat

5' -catggaaaatccagcaggagcagag-3' 3' -cttctgggaggt  
hKCRF5

Val Val I I eThrSerGI nGI uGI nLeuGI nArgThrGI nS  
gtggtcattactTcacaggaacagctacaaagaacccaaaGTAAAGTGGGAGAGGGGAGTCGCGTTTGGGG

ctcagtaatg-5'  
hKCRr4

agggcacagTctctTgagagggtagagtcttccatctcatcagcctctTTTTTactgcaacatgcatctc  
cttgaccaaTccagggaaatgggccaaggaaactgggcagTgttagagatggTgtgaggtgggaagTt

cctgctctcaagttgcttataacctgggtcacgggtgaccaaatgaacacgggaaaccaactgtaaatgggtg  
cacgtgtgtgataaggacggcatgggctagtgggccacacagccttatttctgacttctctgataccccc  
atgggatgaccttgagcctgttaccttaccttctctgagctacacttttctcaictgcaaggggagacaa  
taataatttgcatacacagtgaggatccaatgagttcacacatgtaaggcctttaacaaagtacctagcatt  
catgccctcaccgatgctttattgaggcccagtggtgtgctgggtgaaaaagggtgaaataagggtgtgtag  
gtacccttgagaagcttacaggctagtagtacagacttgcatgaaagacatacagacaggtataaaggctg  
ataggttagaagcaggtactgagaactgggggtgggggcagaaacaaaaagaagggaaaaggaaatctcta  
gggggagggaaagagatctgtggggaaaagatcaaaagatgctttgtgagaagatggctcttgaacttcat  
cctgaaggatgagtaggtgtttgccaagcaaataggggttgccaggtatggagacacaaaaatcatgagatt  
ctggaaacttcaggcagttctctttgactggcctgtggacaagaggcagctgagagacagaagggtg  
tttggggcagccactgaagaaatgggggctaacaaatgagggcttgggtgggcagcagtgacgttccactt  
tactgctttgcccgttctctggcttggggtcagaggccccacttcttcacacatctcctagtgcccaat  
gtccttattctcccagctctcactgctgcttttagctgggcccagtggttctccactttgggggcacact  
ggaatcgcccaaggagctttgaaaaactgatgcttggggaccacctccagaactgtgattttttttt  
tttttggtaggggtgctggcatcagatattcttttttaaatgacctagggtggatctactgctgggt  
gagaactattagcttaatttttttcttaaggacaaagaactagatattcttaggctttggggctgtacg  
atctctgttacaactactcaactctgttcgtaattataaagcaaaagaaaaagacagtaaacaaatgagc  
atggctacgctcataataaaaataaattttattaaaaagacactgctgacaggctagagtttgccaatgggt  
tgggttagatgactagttctgggcatcagaacccccagagggcttgcgtaagcagattgttaaacataa  
ttttggattcagtagggctatgggtggctctgaaaatttgcatttctaccagctgtcaggtgtagctgtag  
ggctgggaccacacttttcgaaccctgattttataccatctcttactgggactttcgccattgtgtta  
tcatgggtgtttctgtcctcattaggagtaccttcttctgggtcagcttccaccaggttgacgttttcc  
agtcaaatctggacataattaccaatcttctcaaaaccttgcagtgcttccattgctcattagggaaaa  
aaaatccaaactgtttcacatgggatgtaccatttagtgctgggtgaacctgtccaaatctcactcacc  
catcctttatgtccaagaataccaagttagcttgaatagatcaggctgtgcccggctgttcttgacctt  
atgctttgtgctgatacttttccctggctgggggtgctctccttaacatgaaacacctggcaaaccttct  
ctcagtccttaagactcagctccagacggggcacagtggttaccgctgtaatccagcactttgggag  
gccaaggcaggcagatcacctgagatcaggagtttgagagcagcttggccaacatggcaaaaccccatct  
ctactaaaaatacaaaaaaaaaataccgggcatgggtggcgggcacctgtaatccagctactcaggagggt  
aggcaggagaatcgcttgaaccggggaggttagaggttgcagtgagccaagatcgcacattgcactccag  
cctgggcatcctatgcaaaaactctgtctcaaaaaaagaaagaaaggaagaaagaaaggaagaaagaaa  
gagagagcgaagaaagaaagaaagaaagaaagaaagaaagaaagaaagaaagaaagaaagaaagaa  
gaaagaaagaaagaaagaaagaaagaaagaaagaaagaaagaaagaaagaaagaaagaaagaaagaa  
aaagaaagaaagaaagaaagaaagaaagaaagaaagaaagaaagaaagaaagaaagaaagaaagaa  
cctgagccccacctctgtctcagatgaaacagaccataccttcttccgtgactattctactgtgcatgtg  
tttttagtcaatgcatcttcaacaccttttttccatctgtctcatttattaggctctaagttccttaag  
ggcatcaatcagctgtagttagctttgtacagtagggcagtggttagctggaagaagttaaggaacgtt  
gcacatgacagtgaaacaaagaacaatttgggtgatttaattgagcttgtgaggcaccattcaaacagc  
tgtggcatagatgacgcaaaagagcaggctgtgtggcaggggagggaaagaaagagctgacagaaatgggg  
cttgtgctcacaggatgagctataagagtttgaaaaaatggaaggccaggcagaccaggtgtagaccaggt  
cccaggatggcattgggtgtggcagtgcaagtggatggagatgaagacaaggtaatgagtaaggctatgg  
gatacctgtaaaatccccagggaaagatggcaggagttgggggtggagaggactgtcagggtgtagcaatga  
gttgggagagagggcaggatagccaggaagcaggtatctggaaagagagagctgacctgagcctcccagga  
gtgccaagccagcgtctttagggctgcttccaggagctgggttagtgagatggcagtgacgcccccc  
aggccttctcctggcagctgcacatcaagaatttcatgggcttggtaacctcagtgggcaggccctag  
agaggtcagaaaagtctcttctgggactcctaccagcagctcctgggtctcttttctcccaatctttg

erGI nLeuLeuGI nMetVal LeuGI nGI yTrpLysPheAsnGI yGI ySerLeuTyrTyrPheSer  
tccaggtcagcttctccagatggtctctgcaaggctggaagttcaatgggtggaagcttatattatattttct Exon 5

SerVal LysLysSerTrpHi sGI uAl aGI uGI nPheCysVal SerGI nGI yAl aHi sLeuAl aSerVal A  
agtgtcaagaagcttggcatgaggctgagcagttctgcggtgccaggagcccatctggcatctgtgg

I aSerLysGI uGI uGI n  
cctccaaggaggagcaggtcagagctgagcagatgggggtgtgttgggtggaattgggtgtggaataagggg

ctttgggtgttttggccttctgctctcagtggggtatgacggagacctccatgtctcctctgccaggcagg  
gagcaaatattgagtgagttctgatgagcatalgactggaggtagaatccctgacagcaaacctccatg  
tcttccatgaatgaggagacaccagaggtcaagagacatcagcagggaggaaggccaaggggaggtggc  
atcaggtgatgcccttaagtgttaggagcacacttcccttcttgcatttgttttctctcaggcttgt  
ttccagtcacttttttttggagacagtgctctgctcctcaggtggagtgagtagcctgatca  
tggctgactgcaacctgaccttcttgcctcaagcagctctccacctcagcccactgagtaggtcagctc  
cccaagtagctgtgactacagatgcacgacacctgtctggctaaatttggggagttttttttaga  
aatgggggttctgcatgttggcaaggctggctctcaactttagggctcaagttattcaccgaagtggggc  
tccaaagtgtgggagtgagccatgcatccagcctgtcttgatttttaattgtagttaatccagctgct  
gtagagggcccatgaataggagaccaggcttcttgggaagaccaggcacaacatagggctccaggac  
caccaaacgcaataccgtcccaggtggctcactgtcgtggctcttcaagaacttggcaggatfactaac  
aaagaaccacaatgtttgtgttccaatttggctgacagactgcttacccttggctggctcgcctgaga  
ccactgttactggcctgagaaagaacatgcaactctgtaaaacacatcttcttaataagctatgggaggt  
gctggcactatggctatggcagaggggagggcagtgctgaggcagaaacaggcagggcaccagggcaggg  
atattataatggcctgatgaaatctttgataaaaatggacagctacactagctgctcaacagcttattca  
acagaacataagagcagattgtctcaatattgacaaaaatcttgaagcaccataagggccaagatgaaggt

gtatggaagtatgacatttaagacaattgtgccttgagctaattggacttgctgtcaaacttcagcgtga  
atgccatccagatacttgctactcaaatgacagcagctgaacaatggattttctttgcatagctcataaa  
actccaaaagagtgtcgtgctatagactatactagacacacacttggtggctgcatgtcttctgaaatg  
gcaataaataatccccagcaggggttagcataaaggaatcatctgtagtgacacacaaaatcagtagccg  
tagaatttacagaataatccccacatgtttatccccatcattggcagafattgatgaatatgaaaatgaa  
acattttttgtgccattgggtttattaaatgtgtatgaaatataatitgatgtccaaggataacctgatg  
taccaattttagaagagggtacagaattcaatttctggggaaagtgaagcatgaagggaatcaaatgg  
gaaaatgtactgatcacataattaacattaattacgtactgtatafaatcaatttagacacatcaatcgtg  
tatccatattatagcttctttgttttagtatagggttttgatcctctgtgtttgccttttaaaatgggaaat  
acttttttttttttttttttttttttggcagacagagtttctgctctattgccaggctggagtgcaatgggtg  
gatcttggctcactgcaacctccgcctcccgggttcaagggttctcctgcctcagcttcccagtagct  
gggattacaggcactgcccacatgcccagctaatttttgatttttagtagagacggggttccacatg  
ctggccaagctggctcgaactcccagctcagggtgatccgcctgccttggcctcccagaagtgcgggat  
tacaggcatgagccactgtgcctggcctaaaatgggaaatacttttaagtattcataagctgtatatt  
catcagatgtggcactcatgattttttaataagatttagtattatctgtttataatgacctgttaatgaaaga  
atctacagtttggtaaaatgtctgctaaacaatcatttagatcacaatcctcatcaagcaaacccatctat  
taaaaaaaaaaaaaagagtgagagcttgagggttccacacaagccattactaaagaagtagaaatgtttt  
cctttgggtttaccctgagtttagatatacctaaaaaattctatagtagacacagttttgtcttacctcttaa  
ctttcccaaatgagataaaagtgttttaaaatctgtttacagtttttgatataatataatattgt  
gtatatctataagcaggttctccagggtggcctggaaaactggctccccacacacaggggcaaacctgacac

Al aPheLeuVal Gl uPheThrSerLysVal TyrTyrTrpI l eGl yLeuThrAsp  
tgccctttctctgagcatttctggttagagttcacaagtaaagtgactactggatcggctcactgac Exon 6  
5'-ctggttagagttcacaagtaaagtg-3' 3'-cctagccagagtgactg  
hKCRf6

ArgGl yThrGl uGl ySerTrpArgTrpThrAspGl yThrProPheAsnAl aAl aGl nAsnLysAl  
aggggacagagggctcctggcgtggacagatgggacaccattcaacgcccccagaacaaagcgtgag  
tccccgt-5' 3'-ctgtggaagtgcggcgggtctt-5'  
hKCRr5 hKCRr7

tctagccaccatctggcgtgtcccaggcactgtctttgggtggacctagctacacactgtgtgtcccttc  
ccagtaagtggtagtgtgtgtgtatgtgtgtgtgacgtgtgtgggtgtgtatgtgggtgtatgtgtggg  
gtgtgtgccatgtatgtggcatgtgtaatgcatgtgggtgtgaggggtgtatgtgtggatgtgtgtgag  
tgtgtgcttggacacacaggtgtggatcgtctcaccctggactcctccacagaggggtcattaggaa  
aggacaggtcctgaggctggcatgcagccagtgagtggggtctttctgtttttttccccctgccctactca

ggcctgggtccaagggatcctgccactcagaaagatattattgtgaattctgggatgggagcttgacg Exon X  
3'-caaggttccctaggacgggtgagt-5' 3'-cgtc  
hKCRr8

cttcatagacaccctccctgtccctggatcctcagtaactaagagcaacctgagcagacaccctcag  
gaagtatct-5' 3'-cctaggagtcattgattctcgttg-5' 3'-gtctgtgggagtc  
hKCRr9 hKCRr10

ggactccttctcccagccctgtcctcatcctagggccactaggggatgaaggaccatctcaagtcagc  
ccatgaggaag-5'  
hKCRr11

tcctagactcatccatgtcagctccctaggagccacagcaccaggaaggatgctgccttcatctaac

yPheTrpGl uLysAsnGl nSerAspAsnTrpArgHi sLysAsnGl y  
agtataaagccctgttgtcttctgggtttgggaaagaatcagcttgacaactggcggcacaagaatggg Exon 7

Gl nThrGl uAspCysVal Gl nI l eGl nGl nLysTrpAsnAspMetThrCysAspThrProTyrGl nTrpV  
cagactgaagactgtgtccaaattcagcagaagtggaaatgacatgacctgtgacacccccatcagttggg  
3'-cacc

al CysLysLysProMetGl yGl nGl yVal Al a\*\*\*  
tgtgcaagaagcccatgggcccaggggtgtggcctgagggcaggccagagctgaggggctgctcctgcttgc  
acacgttcttccgggtacc-5' 3'-ggactcccgtccgggtctcgactcc-5'  
hKCRr12 hKCRr6  
3'-ccgacgaggacgaacg

caactgaccctcctcctcgatgccttccggagcctctgagctctgcttgttctctgggaccttccgtt  
gttatgac-5' 3'-ctacggaagcctcggagactcgag-5'  
hKCRr13 hKCRr14

gccttgtggacttctgccttgttcttttgattcagcccttcaaacatgcttacctcgagtgaccagtg  
acatcagttggcttctcaaggaagagccttgcctgtgcccctgtagcctcagcaccagcagggcctgtc  
agacagcaggtcctcaataaatactcgttggatcaacaaaagcttctgtgctggcttttcttgtggcgg  
ccactaccctctcctccctggattgggttctccttccctcagcgttcttctgtctcaaaaacagcaca

**Figure S3.** PCR primers for cow CLEC4f cDNA. PCR primers are indicated in blue. The red sequence shows the linker sequence used to insert the fragment into the pT5T expression vector.

ggatccgatcttggag  
5' -ggatccgatcttggag  
boKCRF21

MetAl aThrGI nThrPheVal ArgGI ySerLeuAspAsnThrSerAl aGI n  
gatgattaaatggcgaccagacctttgtaagaggcagtttagacaacaccagtgctcag  
gatgattaaatggcgaccagacctttgtaagaggc-3'

I l eGI nVal LeuArgSerHi sLeuGI uArgAl aGI yGI yGI ul l eHi sLeuLeuLysArg  
atccaggtgtaagaagtcatttgaaagggtggaggtgagatcacttgttaaaaaga

AspLeuGI uAsnVal ThrAl aGI nThrGI nThrAl aSerSerHi sLeuGI uGI nThrAsp  
gatttgaaaaatgtcactgcccagaccacaacagcaagcagtcacctggagcagacagat

Al aGI uMetArgVal LeuLysThrGI uLeuGI uSerAl al l eAl aLeuSerSerLysl l e  
gctgagatgagagattaaaaacagagctggaaagtgccattgccttaagtccaagatt

GI nVal LeuAsnGI yLeuLeuArgAsnAl aSerGI nGI ul l eGI nThrLeuLysGI nGI y  
caggtgttaaatggctctttgagaaatgccagccaagagatacagaccttaaaacaagga

MetLysAspAl aAl aAl aLeuGI nSerGI nThrGI nMetLeuGI uArgSerLeuGI nGI u  
atgaaggatgccgcagccttacagtcccagaccacaatgttagagagaagctcgcaggag

Al aArgThrGI ul l eGI nThrLeuArgLysAspLeuGI yAsnThrLysThrLeuArgThr  
gccagaactgagatccagacattaagaaaggatttggggaacacaaaacactgaggaca

ThrI l eGI nGI uGI nGI nArgSerLeuGI uSerPheArgThrAl aLeuAl aSerGI nGI u  
acaatccaggagcagcagagaagcctggagtccttccgcacagccttggcttcacaggag

GI nLeuGI nArgAsnHi sAsnGI nLeuPheGI nLeuPheLeuGI nGI yTrpLysPheTyr  
cagctccagaggaaccacaatcaactttccagctgttcttgcaaggctggaagttctac

SerGI ySerLeuTyrTyrPheSerSerAl aLysLysThrTrpGI nGI uAl aGI uGI nPhe  
agtgggagcttgtattactttcttctgccaagaagacgtggcaggaggccgagcagttc

CysVal SerHi sGI yAl aHi sLeuAl aSerVal ThrSerGI uGI uGI uLysThrPheLeu  
tgtgtgtcccatggagcccacctggcctcggtgacctcggaggaggagaagacattctg

I l eGI nPheThrSerSerVal TyrHi sTrpI l eGI yLeuThrAspHi sGI yThrGI uGI y  
atacagttcacagagttctgtttaccactggattggcctcactgaccacggtacggagggc

Hi sTrpArgTrpThrAspGI yThrAl aPheAspArgAl aArgSerArgAl aPheTrpAl a  
cactggcgtcggacagatggcacagcattcgatcgtgccaggagccgtgcgttttgggct

GI uAsnGI nProAspAsnTrpGI nHi sGI yI l eGI yGI nSerGI uAspCysVal GI nMet  
gagaatcagccagataactggcaacacgggtattgggcaatcggaagactgtgtccagatg

GI nGI nLysTrpAsnAspI l eSerCysSerThrLeuCysArgTrpI l eCysLysLysPro  
cagcagaagtggaatgacatatcctgctccactctctgccgtggatctgcaagaagcct  
3' -cgga

MetVal GI nLeu\*\*\*  
atggtccagctgtagcccggggcaggggggctgagacccttctccacgacgccttggaaag  
taccaggtcgacatcggggcc-5'  
boKCRr11

**Figure S5.** Sequence of codon-optimized cDNA for chimpanzee CLEC4f.

ggatccgatcttg  
MetAl aThrGI nAl aPheI l eLysSerSerPheAspAsnThrSerAl a  
gaggatgattaaatggccaccaggcatttatcaaatccagctttgataataccagcgca  
GI ul l eGI nPheLeuArgGI yHi sLeuGI uArgAl aGI yAspGI ul l eHi sVal LeuLys  
gaaattcagtttctgctggtcatctggaacgtgccggtgatgaaattcatgttctgaaa  
ArgAspLeuGI uMetVal ThrAl aGI nThrGI nLysAl aAsnGI yArgLeuAspGI nThr  
cgtgatctggaaatggttaccgcacagaccagaaagcaaatggtcgtctggatcagacc  
AspThrGI nI l eGI nVal PheLysAl aGI uMetGI uAsnAl aAsnThrLeuAsnAl aGI n  
gatacacagattcaggtttttaagccgaaatggaaaaatgcgaaataccctgaatgcccag  
I l eGI nVal LeuAsnGI yHi sMetLysAsnAl aSerArgGI ul l eGI nThrLeuLysGI n  
atccaggttctgaaatggtcatatgaaaaatgccagccgtgaaattcagaccctgaaacag  
GI yMetLysAsnAl aSerAl aLeuThrSerGI nThrGI nMetLeuAspSerAsnLeuGI n  
ggtatgaaaaacgcaagcgcactgaccagccagacacagatgctggatagcaatctgcag  
LysAl aSerAl aGI ul l eArgArgLeuArgGI yAspLeuGI uAsnThrLysAl aLeuThr  
aaagcatcagccgaaattcgtcgcctgctggtgatttagaaaaatccaaagcgtgacc  
MetGI ul l eGI nGI nGI uGI nSerArgLeuLysThrLeuHi sGI uVal Val ThrSerGI n  
atggaaattcagcaagaacagagccgtctgaaaaccctgcatgaagtgttaccagccaa  
GI uGI nLeuGI nArgThrGI nSerGI nLeuLeuGI nMetVal LeuGI nGI yTrpLysPhe  
gaacagctgcagcgtaccagagccagctgctgcagatggttctgcaaggttggaattt  
AsnGI yGI ySerLeuTyrTyrPheSerSerVal LysLysSerTrpHi sGI uAl aGI uGI n  
aacggtggaagcttgtattatctcagcagcgtgaaaaaaagctggcatgaagcagaacag  
PheCysVal SerGI nGI yAl aHi sLeuAl aSerVal Al aSerLysGI uGI uGI nAl aPhe  
ttttgtgttagccaggggtgcacatctggcaagcgttgcaagcaagaagaacaggcattt  
LeuVal GI uPheThrSerLysVal TyrTyrTrpI l eGI yLeuThrAspArgGI yThrGI n  
ctggttgaatttaccagcaaagtgtattatggattggtctgaccgatcgtggcaccgaa  
GI ySerTrpArgTrpThrAspGI yThrProPheAsnAl aAl aGI nAsnLysAl aPheTrp  
ggtagctggcgttggaccgatggcaccctttaaagcagcacagaaataaagcatttgg  
GI uLysAsnGI nProAspAsnTrpArgHi sLysAsnGI yGI nThrGI uAspCysVal GI n  
gagaaaaatcagccggataactggcgtcataaaaaatggtcagaccgaagattgtgttcag  
I l eGI nGI nLysTrpAsnAspMetThrCysAspThrProTyrGI nTrpVal CysLysLys  
attcagcagaaatggaatgatatgacctgtgataccctgatcagtggtttgtaaaaaa  
ProMetGI yGI nGI yVal Al a\*\*\*  
ccgatgggtcaggggtgttgcataagaattc

**Figure S6.** PCR primers for Rhesus monkey CLEC4f cDNA. The predicted full-length cDNA for Rhesus CLEC4f is shown in back, with PCR primers highlighted in blue.

MetAspGI yGI uAl aVal ArgPheCysThrAspAsnGI nCysVal SerLeuHi sProArg  
 atggatgggtgaggcagtcgcgttctgcacagataaccagtggtctccttgcacccccga  
 5' -atggatgggtgaggcagtcgcgttctgcacagataaccagtggtctccttgcacccccga-3'  
 rhKCRf1

GI yVal AspSerVal Al aThrAl aSerAl aAl aProLysI I eProArgLeuI eGI nAl a  
 ggggtggactctgtggcaacggcttctgcagcccccaagataccaaggctcattcaggct

ThrProAl aPheMetAl aVal ThrLeuVal PheSerLeuVal ThrLeuPheVal Val Val  
 accccggcatttatggctgtgaccttagtcttctcttcttgtgactctctttagtagtggtt

GI nGI nHi sThrArgProVal ProLysProVal GI nAl aMetI I eLeuGI yAspAsnI I e  
 caacagcacacaagacctgtgccgaagcctgtgcaagccatgatctctgggagacaacatt

ThrGI yHi sLeuProPheGI uProAsnAsnHi sHi sHi sPheGI yArgGI uAl aGI uMet  
 actgggcatttaccttttgaaccaacaatcatcaccactttggcagggaggcagaaaatg

GI nGI uLeuI eGI nI I eLeuLysGI yHi sMetGI uAsnSerSerThrTrpVal Al aGI u  
 caagagcttatccagatattgaaaggccacatggagaattccagcacctgggtagcagag

I I eGI nMetLeuArgCysArgVal AspAsnVal AsnLeuGI nLeuGI nLeuLeuAspAsp  
 atccagatgttgagggtgcagagtgacaatgtcaatttgcagctccagctgctcgatgat

Hi sLeuGI yAsnThrSerAl aAspI I eGI nMetVal LysGI yVal LeuLysAspAl aThr  
 catctgggaaacaccagtgctgacatccagatggtaaaaggagtcttaaaggatgccact

ThrLeuSerLeuGI nThrGI nMetLeuArgSerSerLeuGI uGI yThrAsnAl aGI uI I e  
 aactgagtttgcagaccagatgttaaggagttccctggagggaaaccaatgctgagatc

GI nArgLeuLysGI yGI yLeuGI uLysAl aAspAl aLeuThrPheArgThrGI nAsnPhe  
 cagaggctcaagggaggcctggaaaaggcagatgctttaactttccggaccagaaatttc

LeuLysSerSerLeuGI uAsnThrSerI I eGI uLeuHi sMetLeuSerArgGI yLeuGI u  
 ttaaaaagcagtttagaaaacaccagcattgagctccacatgctaagcagaggcttagaa

AsnAl aAsnSerGI uI I eGI nMetLeuAsnAl aSerLeuGI uMetAl aAsnAl aGI nAl a  
 aatgcaaactctgaaattcagatgttgaatgccagtttggaaatggcaaatgcccaggct

ArgLeuAl aAsnSerSerLeuLysAsnAl aAsnAl aGI uI I eHi sVal LeuArgGI yHi s  
 cgttagccaacagcagtttaagaacgctaatactgagatccatgttttgagaggccat

LeuAspArgVal AsnAspLeuArgThrGI nSerGI nVal LeuArgSerSerLeuGI uGI y  
 ctagatagggcaatgacttgaggaccagagccaggttttaagaagtagtttggaaagga

Al aAsnAl aGI uI I eGI nGI yLeuLysGI uAsnLeuGI nAsnThrAsnAl aLeuAsnSer  
 gccaatgctgagatccagggactaaaggaaaatctgcagaatacaaatgctttaactcc  
 5' -atgctgagatccagggactaaagg-3'  
 rhKCRf2

GI nThrGI nAl aPheI I eLysGI ySerPheAspAsnThrSerAl aGI uI I eGI nPheLeu  
 cagaccaggcctttataaaaggcagtttgcacaacaccagtgctgagatccagttccta

ArgGI yHi sLeuGI uArgAl aGI yAspGI uI I eHi sMetLeuLysArgAspLeuGI uThr  
 agaggcatttggaaagggtggtgatgaaattccatgttaaaaagggtttggaaacg  
 3' -ctccagtaaaccctttcccaccac-5'  
 rhKCRr1

Val ThrAl aGI nThrGI nLysAl aAsnGI yArgLeuAspGI nThrAspAl aGI nI I eGI n  
 gtcacagcccagaccaaaagcaaatggccgtctggaccagacagatgctcagattcag

Val PheLysAl aGI uMetGI uAsnAl aAsnThrLeuAsnAl aGI nI I eArgVal LeuAsn  
 gtattcaaggcagagatggaaaatgccaataccttaaatgcccagattagggttttaaat

GI yHi sLysLysAsnAl aSerArgGI uMetGI nThrLeuLysGI nGI uMetLysAsnAl a  
 ggtcataagaagaatgccagcagagagatgcagaccctaaaacaagaatgaagaatgct

SerAl aLeuThrSerGI nThrGI nMetLeuAspSerAsnLeuGI nLysAl aSerAl aGI u  
tcggctttaacttcccagaccagatgtagacagcaatctgcagaaggccagtgctgag

I l eLeuArgLeuArgGI yAspLeuGI uAsnThrLysAl aLeuThrMetGI uI l eGI nGI n  
atcctgagggttaagaggggatctagagaacaccaaagctctaaccatggaaatccagcag

GI uGI nSerArgLeuLysThrLeuHi sLysVal Val Al aSerGI nGI uGI nLeuGI nArg  
gagcagagtcgcctgaagaccctccacaaggttggttgcttcacaggaacagctacaaaga

I l eGI nSerGI nLeuLeuGI nMetVal LeuGI nAl aTrpLysPheAsnGI yGI ySerLeu  
atccaaagtcaacttctccagatggtcctgcaagcctggaagttcaatgggtggaagctta

TyrTyrPheSerHi sVal LysLysSerTrpHi sGI uAl aGI uGI nPheCysVal SerGI n  
tattatcttctcatgtcaagaagctcttgcatgaggctgagcagttctgtgtgtcccag

GI yAl aHi sLeuAl aSerVal Al aSerLysGI uGI uGI nI l eArgAl aPheLeuVal GI u  
ggagcccacctggcatctgtggcctccaaggaggagcagatcagagcatttctggtagag

Val ThrGI yGI nAl aTyrTyrTrpI l eGI yLeuThrAspArgGI yThrGI uGI ySerTrp  
gtcacaggtcaagcgtactactggatcgggtctcactgacaggggcacagagggctcctgg

CysTrpThrAspGI yThrProPheAsnVal ThrGI nAsnLysThrPheTrpGI uArgAsn  
tgctggacagacgggacaccattcaacgtcaccagaacaaaacgttttgggaaaggaat

ArgProAspAsnTrpGI nHi sLysAsnGI yGI nThrGI uAspCysVal Hi sI l eGI nGI n  
cggcctgacaactggcagcacaagaatgggcagactgaagactgtgtccacattcagcag

LysTrpAsnAspMetThrCysAspThrProTyrGI nTrpVal CysLysLysProMetGI y  
aagtggaatgacatgacctgtgacaccccctatcagtgggtgtgcaagaagccatgggc

Hi sGI yVal Al a\*\*\*

catgggtgtggcctgagggcaggccagagctgaggggctgctcctgcccgccaatactgac

3' -gtaccacaccggactcccgtccgg-5' rhKCRr2 3' -gacgaggacgggcggttatgactg-5' rhKCRr3

Table S1. Database information for CLEC4f genes examined. Gene and accession numbers are based on the NCBI database. Species for which full-length proteins appear to be encoded have been assigned numbers corresponding to the sequences shown in supplemental Fig. S1.

| Number in Figure S1 | Species                                            | Common name                            | Gene ID   | Splice form | RNA accession | Protein accession |
|---------------------|----------------------------------------------------|----------------------------------------|-----------|-------------|---------------|-------------------|
|                     | <i>Homo sapiens</i>                                | Human                                  | 165530    | X1          | XM_017003519  | XP_016859008      |
|                     | <i>Papio anubis</i>                                | Olive baboon                           | 101026260 | -           | XM_021924928  | XP_021780620      |
|                     | <i>Theropithecus gelada</i>                        | Gelada                                 | 112604829 | -           | XM_025354289  | XP_025210074      |
|                     | <i>Chlorocebus sabaeus</i>                         | Green monkey                           | 103220085 | -           | XM_007970307  | XP_007968498      |
|                     | <i>Rhinopithecus bieti</i>                         | Black snub-nosed monkey                | 108524566 | -           | XM_017865655  | XP_017721144      |
|                     | <i>Rhinopithecus roxellana</i>                     | Golden snub-nosed monkey               | 104661327 | -           | XM_010361910  | XP_010360212      |
|                     | <i>Colobus angolensis palliatus</i>                | Angolan colobus                        | 105514078 | -           | XM_011945217  | XP_011800607      |
| 1                   | <i>Macaca mulatta</i>                              | Rhesus monkey                          | 703303    | -           | XM_015112720  | XP_014968206      |
| 2                   | <i>Macaca nemestrina</i>                           | Pig-tailed macaque                     | 105465227 | -           | XM_011713518  | XP_011711820      |
| 3                   | <i>Macaca fascicularis</i>                         | Crab-eating macaque                    | 102142629 | -           | XM_005575644  | XP_005575701      |
| 4                   | <i>Cercocebus atys</i>                             | Sooty mangabey                         | 105576544 | -           | XM_012039738  | XP_011895128      |
| 5                   | <i>Mandrillus leucophaeus</i>                      | Drill                                  | 105540141 | -           | XM_011980632  | XP_011836022      |
| 6                   | <i>Ptilocolobus tephrosceles</i>                   | Ugandan red Colobus                    | 111550552 | -           | XM_023224034  | XP_023079802      |
| 7                   | <i>Pan troglodytes</i>                             | Chimpanzee                             | 737309    | X2          | XM_016948724  | XP_016804213      |
| 8                   | <i>Pan paniscus</i>                                | Pygmy chimpanzee                       | 100974761 | -           | XM_003830950  | XP_003830998      |
| 9                   | <i>Gorilla gorilla</i>                             | Western gorilla                        | 101148244 | -           | XM_019020743  | XP_018876288      |
| 10                  | <i>Pongo abelii</i>                                | Sumatran orangutan                     | 100451025 | X1          | XM_009237203  | XP_009235478      |
| 11                  | <i>Callithrix jacchus</i>                          | White-tufted-ear marmoset              | 100401930 | -           | XM_017964248  | XP_017819737      |
| 12                  | <i>Cebus capucinus imitator</i>                    | White-headed capuchin                  | 108299635 | X1          | XM_017522014  | XP_017377502      |
| 13                  | <i>Saimiri boliviensis</i>                         | Bolivian squirrel monkey               | 101043911 | X1          | XM_010333495  | XP_010331797      |
| 14                  | <i>Aotus nancymaae</i>                             | Ma's night monkey                      | 105733326 | X3          | XM_012475687  | XP_012331110      |
| 15                  | <i>Mus musculus</i>                                | Mouse                                  | 51811     | -           | NM_016751     | NP_058031         |
| 16                  | <i>Mus pahari</i>                                  | Shrew mouse                            | 110317186 | -           | XM_021191607  | XP_021047266      |
| 17                  | <i>Mus caroli</i>                                  | Ryukyuu mouse                          | 110296367 | -           | XM_021165037  | XP_021020696      |
| 18                  | <i>Rattus norvegicus</i>                           | Norway rat                             | 114598    | -           | NM_053753     | NP_446205         |
| 19                  | <i>Meriones unguiculatus</i>                       | Mongolian gerbil                       | 110551235 | -           | XM_021641676  | XP_021497351      |
| 20                  | <i>Microtus ochrogaster</i>                        | Prairie vole                           | 101989225 | -           | XM_013352937  | XP_013208391      |
| 21                  | <i>Peromyscus maniculatus bairdii</i>              | Prairie deer mouse                     | 102908332 | -           | XM_006998170  | XP_006998232      |
| 22                  | <i>Cricetulus griseus</i>                          | Chinese hamster                        | 100754159 | X2          | XM_016966055  | XP_016821544      |
| 23                  | <i>Mesocricetus auratus</i>                        | Golden hamster                         | 101832019 | -           | XM_013114123  | XP_012969577      |
| 24                  | <i>Heterocephalus glaber</i>                       | Naked mole-rat                         | 101722072 | -           | XM_004849902  | XP_004849959      |
| 25                  | <i>Fukomys damarensis</i>                          | Damara mole-rat                        | 104852126 | -           | XM_010609646  | XP_010607948      |
| 26                  | <i>Marmota marmota marmota</i>                     | Alpine marmot                          | 107137190 | -           | XM_015479548  | XP_015335034      |
| 27                  | <i>Ictidomys tridecemlineatus</i>                  | Thirteen-lined ground squirrel         | 101970621 | X3          | XM_005322127  | XP_005322184      |
| 28                  | <i>Arctomys parryi</i>                             | Arctic ground squirrel                 | 113194159 | -           | XM_026405142  | XP_026260927      |
| 29                  | <i>Nannospalax galili</i>                          | Upper Galilee mountains blind mole rat | 103726957 | -           | XM_008824693  | XP_008822915      |
| 30                  | <i>Jaculus jaculus</i>                             | Lesser Egyptian jerboa                 | 101609127 | -           | XM_004668238  | XP_004668295      |
| 31                  | <i>Cavia porcellus</i>                             | Domestic guinea pig                    | 100717739 | -           | XM_023564792  | XP_023420560      |
| 32                  | <i>Chinchilla lanigera</i>                         | Long-tailed chinchilla                 | 102003356 | X1          | XM_013514742  | XP_013370196      |
| 33                  | <i>Octodon degus</i>                               | Degu                                   | 101559694 | -           | XM_023718429  | XP_023574197      |
| 34                  | <i>Castor canadensis</i>                           | American beaver                        | 109697340 | -           | XM_020180884  | XP_020036473      |
| 35                  | <i>Dipodomys ordii</i>                             | Ord's kangaroo rat                     | 5990160   | X1          | XM_013022485  | XP_012877939      |
| 36                  | <i>Bos taurus</i>                                  | Cow                                    | 511001    | X1          | XM_588244     | XP_588244         |
| 37                  | <i>Bos indicus</i>                                 | Zebu cattle                            | 109565954 | X1          | XM_019969957  | XP_019825516      |
| 38                  | <i>Bos mutus</i>                                   | Wild yak                               | 102276817 | -           | XM_014476999  | XP_014332485      |
| 39                  | <i>Ovis aries</i>                                  | Sheep                                  | 101102383 | X2          | XM_012123507  | XP_011978897      |
| 40                  | <i>Capra hircus</i>                                | Goat                                   | 102185659 | X2          | XM_005686384  | XP_005686441      |
| 41                  | <i>Bison bison bison</i>                           | Bison                                  | 104980931 | -           | XM_010829796  | XP_010828098      |
| 42                  | <i>Bubalus bubalis</i>                             | Water buffalo                          | 102401984 | -           | XM_006066648  | XP_006066710      |
| 43                  | <i>Pantholops hodgsonii</i>                        | Chiru                                  | 102340435 | -           | XM_005963865  | XP_005963927      |
| 44                  | <i>Tursiops truncatus</i>                          | Bottlenose dolphin                     | 101324404 | -           | XM_004331939  | XP_004331987      |
| 45                  | <i>Orcinus orca</i>                                | Killer whale                           | 101281015 | -           | XM_004277128  | XP_004277176      |
| 46                  | <i>Delphinapterus leucas</i>                       | Beluga whale                           | 111167925 | X1          | XM_022561295  | XP_022417003      |
| 47                  | <i>Neophocaena asiaeorientalis asiaeorientalis</i> | Yangtze finless porpoise               | 112407229 | -           | XM_024756425  | XP_024612193      |
| 48                  | <i>Lipotes vexillifer</i>                          | Yangtze River dolphin                  | 103076707 | -           | XM_007453429  | XP_007453491      |
| 49                  | <i>Physeter catodon</i>                            | Sperm whale                            | 102974112 | -           | XM_024133475  | XP_023989243      |
| 50                  | <i>Balaenoptera acutorostrata scammoni</i>         | Common Minke whale                     | 103002184 | -           | XM_007175540  | XP_007175602      |
| 51                  | <i>Camelus dromedarius</i>                         | Arabian camel                          | 105102105 | -           | XM_010995372  | XP_010993674      |
| 52                  | <i>Camelus bactrianus</i>                          | Bactrian camel                         | 105075784 | -           | XM_010963722  | XP_010962024      |
| 53                  | <i>Camelus ferus</i>                               | Wild Bactrian camel                    | 102507489 | -           | XM_014565165  | XP_014420651      |
| 54                  | <i>Vicugna pacos</i>                               | Alpaca                                 | 102535473 | -           | XM_006201587  | XP_006201649      |
| 55                  | <i>Odocoileus virginianus texanus</i>              | Texas white-tailed deer                | 110124393 | -           | XM_020872915  | XP_020728574      |
| 56                  | <i>Sus scrofa</i>                                  | Pig                                    | 100524617 | -           | XM_021087395  | XP_020943054      |
| 57                  | <i>Panthera pardus</i>                             | Leopard                                | 109262498 | X1          | XM_019441204  | XP_019296749      |
| 58                  | <i>Panthera tigris altaica</i>                     | Amur tiger                             | 102957975 | -           | XM_007083513  | XP_007083575      |
| 59                  | <i>Puma concolor</i>                               | Puma                                   | 112869308 | -           | XM_025932422  | XP_025788207      |
| 60                  | <i>Felis catus</i>                                 | Domestic cat                           | 101095892 | X2          | XM_023251750  | XP_023107518      |
| 61                  | <i>Acinonyx jubatus</i>                            | Cheetah                                | 106967767 | -           | XM_015064063  | XP_014919549      |
| 62                  | <i>Neomonachus schauinslandi</i>                   | Hawaiian monk seal                     | 110588739 | -           | XM_021699118  | XP_021554793      |
| 63                  | <i>Leptonychotes weddellii</i>                     | Weddell seal                           | 102742625 | -           | XM_006728026  | XP_006728089      |
| 64                  | <i>Callorhinus ursinus</i>                         | Northern fur seal                      | 112820692 | X1          | XM_025867655  | XP_025723440      |
| 65                  | <i>Ailuropoda melanoleuca</i>                      | Giant panda                            | 100466968 | -           | XM_01979486   | XP_019650420      |
| 66                  | <i>Ursus maritimus</i>                             | Polar bear                             | 103671817 | -           | XM_008700481  | XP_008698703      |
| 67                  | <i>Ursus arctos horribilis</i>                     | Grizzly bear                           | 113268282 | -           | XM_026516655  | XP_026372440      |
| 68                  | <i>Canis lupus familiaris</i>                      | Dog                                    | 481424    | -           | XM_014117598  | XP_013973073      |
| 69                  | <i>Canis lupus dingo</i>                           | Dingo                                  | 112674520 | -           | XM_025470958  | XP_025326743      |
| 70                  | <i>Vulpes vulpes</i>                               | Red fox                                | 112934414 | -           | XM_026017847  | XP_025873632      |
| 71                  | <i>Odobenus rosmarus divergens</i>                 | Pacific walrus                         | 101386956 | -           | XM_012561776  | XP_012417230      |
| 72                  | <i>Mustela putorius furo</i>                       | Domestic ferret                        | 101679114 | X1          | XM_004742148  | XP_004742205      |
| 73                  | <i>Myotis davidii</i>                              | Vesper bat                             | 102768210 | X2          | XM_006775304  | XP_006775367      |
| 74                  | <i>Myotis lucifugus</i>                            | Little brown bat                       | 102433984 | -           | XM_006092947  | XP_006093009      |

|     |                                       |                              |           |    |              |               |
|-----|---------------------------------------|------------------------------|-----------|----|--------------|---------------|
| 75  | <i>Myotis brandtii</i>                | Brandt's bat                 | 102248636 | X1 | XM_005867784 | XP_005867846  |
| 76  | <i>Miniopterus natalensis</i>         | Natal long-fingered bat      | 107529235 | -  | XM_016202524 | XP_016058010  |
| 77  | <i>Eptesicus fuscus</i>               | Big brown bat                | 103291443 | -  | XM_008147490 | XP_008145712  |
| 78  | <i>Pteropus vampyrus</i>              | Large flying fox             | 105295792 | -  | XM_011365615 | XP_011363917  |
| 79  | <i>Pteropus alecto</i>                | Black flying fox             | 102887743 | -  | XM_006909674 | XP_006909736  |
| 80  | <i>Rousettus aegyptiacus</i>          | Egyptian rousette            | 107516243 | X1 | XM_016155801 | XP_016011287. |
| 81  | <i>Rhinolophus sinicus</i>            | Chinese rufous horseshoe bat | 109438708 | -  | XM_019718728 | XP_019574287  |
| 82  | <i>Hipposideros armiger</i>           | Great roundleaf bat          | 109385376 | -  | XM_019647609 | XP_019503154  |
| 83  | <i>Desmodus rotundus</i>              | Common vampire bat           | 112298048 | -  | XM_024552957 | XP_024408725  |
| 83  | <i>Equus caballus</i>                 | Horse                        | 100060281 | -  | XM_014731102 | XP_014586588  |
| 84  | <i>Equus przewalskii</i>              | Przewalski's horse           | 103547578 | -  | XM_008514829 | XP_008513051  |
| 85  | <i>Equus asinus</i>                   | Ass                          | 106828309 | -  | XM_014836685 | XP_014692171  |
| 86  | <i>Ceratotherium simum simum</i>      | southern white rhinoceros    | 101404218 | -  | XM_014791404 | XP_014646890  |
| 87  | <i>Condylura cristata</i>             | Star-nosed mole              | 101629561 | -  | XM_012731463 | XP_012586917  |
| 89  | <i>Sorex araneus</i>                  | European shrew               | 101553079 | -  | XM_012932877 | XP_012788331  |
| 90  | <i>Erinaceus europaeus</i>            | Western European hedgehog    | 103114068 | -  | XM_016188420 | XP_016043906  |
| 91  | <i>Oryctolagus cuniculus</i>          | Rabbit                       | 108176348 | -  | XM_017340683 | XP_017196172  |
| 92  | <i>Ochotona princeps</i>              | American pika                | 101517970 | -  | XM_004582917 | XP_004582974  |
| 93  | <i>Tupaia chinensis</i>               | Chinese tree shrew           | 102491298 | -  | XM_006151316 | XP_006151378  |
| 94  | <i>Manis javanica</i>                 | Malayan pangolin             | 108397459 | X1 | XM_017660904 | XP_017516393  |
| 95  | <i>Orycteropus afer afer</i>          | Aardvark                     | 103196411 | -  | XM_007940144 | XP_007938335  |
| 96  | <i>Loxodonta africana</i>             | African savanna elephant     | 100665899 | X2 | XM_023552753 | XP_023408521  |
| 97  | <i>Trichechus manatus latirostris</i> | Florida manatee              | 101355149 | -  | XM_004369372 | XP_004369429  |
| 98  | <i>Echinops telfairi</i>              | Small Madagascar hedgehog    | 101659139 | -  | XM_013006533 | XP_012861987  |
| 99  | <i>Chrysochloris asiatica</i>         | Cape golden mole             | 102821018 | -  | XM_006862991 | XP_006863053  |
| 100 | <i>Monodelphis domestica</i>          | Gray short-tailed opossum    | 103095831 | -  | XM_016428309 | XP_016283795  |

---

Table S11. Glycan array screening of mouse CLEC4f protein on the Consortium for Function Glycomics array version 2.1.

| Glycan | Structure                                                                                         | Average | Standard deviation |
|--------|---------------------------------------------------------------------------------------------------|---------|--------------------|
| 138    | Galβ1-4(Fucor1-3)GlcNAcβ1-4Galβ1-4(Fucor1-3)GlcNAcβ1-4Galβ1-4(Fucor1-3)GlcNAcβ-Sp0                | 14477   | 2842               |
| 91     | GalNAcβ1-4(Fucor1-3)GlcNAcβ-Sp0                                                                   | 10957   | 1343               |
| 89     | GalNAcβ1-3(Fucor1-2)Galβ-Sp8                                                                      | 10793   | 820                |
| 157    | GlcNAcα1-6Galβ1-4GlcNAcβ-Sp8                                                                      | 9384    | 925                |
| 137    | Galβ1-4(Fucor1-3)GlcNAcβ1-4Galβ1-4(Fucor1-3)GlcNAcβ-Sp0                                           | 8500    | 828                |
| 136    | Galβ1-4(Fucor1-3)GlcNAcβ-Sp8                                                                      | 8421    | 1208               |
| 85     | GalNAcα1-3GalNAcβ-Sp8                                                                             | 7883    | 1235               |
| 10     | α-GalNAc-Sp8                                                                                      | 7753    | 845                |
| 118    | Galβ1-3(Fucor1-4)GlcNAc-Sp8                                                                       | 7397    | 406                |
| 119    | Galβ1-3(Fucor1-4)GlcNAcβ-Sp8                                                                      | 6732    | 2680               |
| 186    | GlcAβ1-6Galβ-Sp8                                                                                  | 6433    | 2062               |
| 135    | Galβ1-4(Fucor1-3)GlcNAcβ-Sp0                                                                      | 6299    | 1124               |
| 7      | α-D-Gal-Sp8                                                                                       | 5724    | 553                |
| 115    | Galβ1-3(Fucor1-4)GlcNAcβ1-3Galβ1-4(Fucor1-3)GlcNAcβ-Sp0                                           | 5414    | 341                |
| 117    | Galβ1-3(Fucor1-4)GlcNAc-Sp0                                                                       | 5370    | 527                |
| 142    | Galβ1-4GalNAcβ1-3(Fucor1-2)Galβ1-4GlcNAcβ-Sp8                                                     | 5234    | 811                |
| 20     | β-GalNAc-Sp8                                                                                      | 5005    | 745                |
| 278    | Galβ1-3GalNAc-T                                                                                   | 4953    | 1499               |
| 54     | Neu5Acα2-6Galβ1-4GlcNAcβ1-2Manα1-3(Neu5Acα2-6Galβ1-4GlcNAcβ1-2Manα1-6)Manβ14GlcNAcβ1-4GlcNAcβ-Sp8 | 4914    | 412                |
| 151    | Galβ1-4GlcNAcβ1-6GalNAcα-Sp8                                                                      | 4777    | 713                |
| 201    | Neu5Acα2-3(Galβ1-3GalNAcβ1-4)Galβ1-4Glcβ-Sp0                                                      | 4745    | 593                |
| 100    | Galα1-3(Galα1-4)Galβ1-4GlcNAcβ-Sp8                                                                | 4219    | 992                |
| 203    | Neu5Acα2-8Neu5Acα2-8Neu5Acα2-3(GalNAcβ1-4)Galβ1-4Glcβ-Sp0                                         | 4109    | 534                |
| 17     | β-D-Gal-Sp8                                                                                       | 4061    | 1314               |
| 12     | α-L-Fuc-Sp9                                                                                       | 4020    | 277                |
| 282    | Galβ1-4(Fucor1-3)GlcNAcβ1-3Galβ1-3(Fucor1-4)GlcNAcβ-Sp0                                           | 3933    | 1588               |
| 206    | Neu5Acα2-8Neu5Acα2-3(GalNAcβ1-4)Galβ1-4Glcβ-Sp0                                                   | 3927    | 935                |
| 247    | Neu5Acα2-6Galβ1-4GlcNAcβ1-3Galβ1-4(Fucor1-3)GlcNAcβ1-3Galβ1-4(Fucor1-3)GlcNAcβ-Sp0                | 3789    | 421                |
| 274    | Galβ1-3(Fucor1-4)GlcNAcβ1-3Galβ1-3(Fucor1-4)GlcNAcβ-Sp0                                           | 3754    | 961                |
| 275    | Galβ1-3-(Galβ1-4GlcNAcβ1-6)GalNAc-T                                                               | 3716    | 554                |
| 113    | Galα1-6Glcβ-Sp8                                                                                   | 3657    | 213                |
| 123    | Galβ1-3(Neu5Acα2-6)GalNAcα-Sp8                                                                    | 3608    | 1260               |
| 276    | Galβ1-3(GlcNAcβ1-6)GalNAc-T                                                                       | 3545    | 397                |
| 204    | Neu5Acα2-8Neu5Acα2-8Neu5Acα2-3(GalNAcβ1-4)Galβ1-4Glcβ-Sp0                                         | 3503    | 709                |
| 127    | Galβ1-3GalNAcβ1-3Galα1-4Galβ1-4Glcβ-Sp0                                                           | 3476    | 681                |
| 90     | GalNAcβ1-3Galα1-4Galβ1-4GlcNAcβ-Sp0                                                               | 3473    | 363                |
| 173    | GlcNAcβ1-4GlcNAcβ1-4GlcNAcβ-Sp8                                                                   | 3469    | 764                |
| 74     | Fucor1-2Galβ-Sp8                                                                                  | 3465    | 333                |
| 92     | GalNAcβ1-4GlcNAcβ-Sp0                                                                             | 3460    | 221                |
| 149    | Galβ1-4GlcNAcβ1-3Galβ1-4Glcβ-Sp8                                                                  | 3453    | 822                |
| 112    | Galα1-4GlcNAcβ-Sp8                                                                                | 3379    | 220                |
| 241    | Neu5Acα2-6(Galβ1-3)GalNAcα-Sp8                                                                    | 3369    | 736                |
| 147    | Galβ1-4GlcNAcβ1-3Galβ1-4GlcNAcβ-Sp0                                                               | 3349    | 198                |
| 86     | GalNAcα1-3Galβ-Sp8                                                                                | 3284    | 336                |
| 211    | Neu5Acα2-3(GalNAcβ1-4)Galβ1-4Glcβ-Sp0                                                             | 3168    | 814                |
| 116    | Galβ1-3(Fucor1-4)GlcNAcβ1-3Galβ1-4GlcNAcβ-Sp0                                                     | 3153    | 423                |
| 233    | Neu5Acα2-3Galβ1-4(Fucor1-3)GlcNAcβ1-3Galβ1-4GlcNAcβ-Sp8                                           | 3145    | 559                |
| 103    | Galα1-3Galβ1-4(Fucor1-3)GlcNAcβ-Sp8                                                               | 3140    | 361                |
| 11     | α-L-Fuc-Sp8                                                                                       | 3120    | 91                 |
| 13     | α-L-Rho-Sp8                                                                                       | 3117    | 392                |
| 16     | β-D-Glc-Sp8                                                                                       | 3116    | 469                |
| 230    | Neu5Acα2-3Galβ1-4(Fucor1-3)GlcNAcβ-Sp0                                                            | 3051    | 804                |
| 122    | Galβ1-3(Neu5Acα2-6)GalNAcα-Sp8                                                                    | 3050    | 203                |
| 129    | Galβ1-3GalNAcβ1-4Galβ1-4Glcβ-Sp8                                                                  | 3013    | 867                |
| 242    | Neu5Acα2-6GalNAcα-Sp8                                                                             | 3005    | 580                |
| 141    | Galβ1-4GalNAcα1-3(Fucor1-2)Galβ1-4GlcNAcβ-Sp8                                                     | 2998    | 262                |
| 128    | Galβ1-3GalNAcβ1-4(Neu5Acα2-3)Galβ1-4Glcβ-Sp0                                                      | 2969    | 139                |
| 126    | Galβ1-3GalNAcβ-Sp8                                                                                | 2966    | 372                |
| 222    | Neu5Acα2-3Galβ-Sp8                                                                                | 2941    | 1361               |
| 124    | Galβ1-3(Neu5Acα2-6)GlcNAcβ1-4Galβ1-4Glcβ-Sp10                                                     | 2936    | 409                |
| 184    | GlcAβ-Sp8                                                                                         | 2929    | 989                |
| 53     | Neu5Acα2-6Galβ1-4GlcNAcβ1-2Manα1-3(Neu5Acα2-6Galβ1-4GlcNAcβ1-2Manα1-6)Manβ14GlcNAcβ1-4GlcNAcβ-Gly | 2929    | 200                |
| 107    | Galα1-3Galβ-Sp8                                                                                   | 2922    | 369                |
| 23     | β-GlcN(Gc)-Sp8                                                                                    | 2883    | 294                |
| 130    | Galβ1-3Galβ-Sp8                                                                                   | 2861    | 288                |
| 105    | Galα1-3Galβ1-4GlcNAcβ-Sp8                                                                         | 2843    | 410                |
| 41     | 6-H <sub>2</sub> PO <sub>3</sub> Mano-Sp8                                                         | 2842    | 224                |
| 251    | Neu5Acα2-6Galβ-Sp8                                                                                | 2836    | 670                |
| 263    | Neu5Gαα2-6Galβ1-4GlcNAcβ-Sp0                                                                      | 2762    | 679                |
| 111    | Galα1-4Galβ1-4Glcβ-Sp0                                                                            | 2759    | 75                 |
| 253    | Neu5Acα2-8Neu5Acα2-3Galβ1-4Glcβ-Sp0                                                               | 2744    | 1273               |
| 132    | Galβ1-3GlcNAcβ1-3Galβ1-4Glcβ-Sp10                                                                 | 2689    | 666                |
| 49     | 9-O-AcNeu5Acα2-6Galβ1-4GlcNAcβ-Sp8                                                                | 2687    | 250                |
| 145    | Galβ1-4GlcNAcβ1-3Galβ1-4(Fucor1-3)GlcNAcβ1-3Galβ1-4(Fucor1-3)GlcNAcβ-Sp0                          | 2678    | 209                |
| 134    | Galβ1-3GlcNAcβ-Sp8                                                                                | 2677    | 434                |
| 125    | Galβ1-3GalNAcα-Sp8                                                                                | 2641    | 680                |
| 185    | GlcAβ1-3Galβ-Sp8                                                                                  | 2639    | 267                |
| 104    | Galα1-3Galβ1-3GlcNAcβ-Sp0                                                                         | 2630    | 685                |
| 87     | GalNAcα1-4(Fucor1-2)Galβ1-4GlcNAcβ-Sp8                                                            | 2624    | 193                |
| 102    | Galα1-3GalNAcβ-Sp8                                                                                | 2604    | 372                |
| 143    | Galβ1-4GlcNAcβ1-3(Galβ1-4GlcNAcβ1-6)GalNAcα-Sp8                                                   | 2563    | 343                |
| 218    | Neu5Acα2-3Galβ1-3(Fucor1-4)GlcNAcβ1-3Galβ1-4(Fucor1-3)GlcNAcβ Sp0                                 | 2529    | 715                |
| 120    | Galβ1-3(Galβ1-4GlcNAcβ1-6)GalNAcα-Sp8                                                             | 2487    | 122                |
| 249    | Neu5Acα2-6Galβ1-4Glcβ-Sp0                                                                         | 2447    | 1075               |
| 154    | Galβ1-4Glcβ-Sp0                                                                                   | 2436    | 885                |
| 93     | GalNAcβ1-4GlcNAcβ-Sp8                                                                             | 2413    | 119                |
| 248    | Neu5Acα2-6Galβ1-4GlcNAcβ1-3Galβ1-4GlcNAcβ-Sp0                                                     | 2322    | 405                |
| 246    | Neu5Acα2-6Galβ1-4GlcNAcβ-Sp8                                                                      | 2322    | 667                |
| 101    | Galα1-3GalNAcα-Sp8                                                                                | 2320    | 477                |
| 261    | Neu5Gαα2-3Galβ1-4Glcβ-Sp0                                                                         | 2288    | 961                |
| 256    | Neu5Acβ2-6(Galβ1-3)GalNAcα-Sp8                                                                    | 2288    | 499                |
| 65     | Fucor1-2Galβ1-4(Fucor1-3)GlcNAcβ1-3Galβ1-4(Fucor1-3)GlcNAcβ-Sp0                                   | 2268    | 300                |
| 172    | (GlcNAcβ1-4)β-Sp8                                                                                 | 2236    | 528                |
| 114    | Galβ1-2Galβ-Sp8                                                                                   | 2230    | 248                |
| 152    | Galβ1-4GlcNAcβ-Sp0                                                                                | 2228    | 588                |
| 148    | Galβ1-4GlcNAcβ1-3Galβ1-4Glcβ-Sp0                                                                  | 2205    | 108                |
| 106    | Galα1-3Galβ1-4Glcβ-Sp0                                                                            | 2203    | 752                |
| 224    | Neu5Acα2-3Galβ1-3GlcNAcβ1-3Galβ1-4GlcNAcβ-Sp0                                                     | 2194    | 1657               |
| 109    | Galα1-4Galβ1-4GlcNAcβ-Sp0                                                                         | 2179    | 270                |
| 229    | Neu5Acα2-3Galβ1-4(Fucor1-3)GlcNAcβ1-3Galβ1-4(Fucor1-3)GlcNAcβ1-3Galβ1-4(Fucor1-3)GlcNAcβ-Sp0      | 2165    | 186                |
| 98     | Galα1-3(Fucor1-2)Galβ1-4Glcβ-Sp0                                                                  | 2134    | 325                |
| 55     | Fucor1-2Galβ1-3GalNAcβ1-3Galα-Sp9                                                                 | 2091    | 528                |
| 78     | Fucβ1-3GlcNAcβ-Sp8                                                                                | 2076    | 639                |
| 277    | Galβ1-3(Neu5Acα2-3Galβ1-4GlcNAcβ1-6)GalNAc-T                                                      | 2070    | 35                 |
| 260    | Neu5Gαα2-3Galβ1-4GlcNAcβ-Sp0                                                                      | 2064    | 779                |
| 197    | Manα1-6(Manα1-3)Manα1-6(Manα2Manα1-3)Manβ1-4GlcNAcβ1-4GlcNAcβ-N                                   | 2062    | 324                |
| 96     | Galα1-3(Fucor1-2)Galβ1-4(Fucor1-3)GlcNAcβ-Sp0                                                     | 2047    | 397                |
| 60     | Fucor1-2Galβ1-3GalNAcβ1-4(Neu5Acα2-3)Galβ1-4Glcβ-Sp9                                              | 2039    | 491                |
| 150    | Galβ1-4GlcNAcβ1-6(Galβ1-3)GalNAcα-Sp8                                                             | 2030    | 547                |
| 250    | Neu5Acα2-6Galβ1-4Glcβ-Sp8                                                                         | 2025    | 210                |
| 209    | Neu5Acα2-3(GalNAcβ1-4)Galβ1-4GlcNAcβ-Sp0                                                          | 2021    | 460                |
| 164    | GlcNAcβ1-3Galβ1-4GlcNAcβ-Sp0                                                                      | 1999    | 537                |
| 133    | Galβ1-3GlcNAcβ-Sp0                                                                                | 1995    | 207                |
| 235    | Neu5Acα2-3Galβ1-4GlcNAcβ1-3Galβ1-4GlcNAcβ1-3Galβ1-4GlcNAcβ-Sp0                                    | 1990    | 312                |
| 121    | Galβ1-3(GlcNAcβ1-6)GalNAcα-Sp8                                                                    | 1967    | 113                |
| 258    | Neu5Gαα2-3Galβ1-3GlcNAcβ-Sp0                                                                      | 1956    | 222                |
| 231    | Neu5Acα2-3Galβ1-4(Fucor1-3)GlcNAcβ-Sp8                                                            | 1949    | 262                |
| 193    | Manα1-2Manα1-6(Manα1-3)Manα1-6(Manα2Manα1-3)Manβ1-4GlcNAcβ1-4GlcNAcβ-N                            | 1937    | 726                |
| 155    | Galβ1-4Glcβ-Sp8                                                                                   | 1912    | 173                |
| 8      | α-D-Glc-Sp8                                                                                       | 1902    | 610                |
| 24     | (Galβ1-4GlcNAcβ) <sub>2</sub> -3,6-GalNAcα-Sp8                                                    | 1890    | 349                |

|     |                                                                                        |      |      |
|-----|----------------------------------------------------------------------------------------|------|------|
| 210 | Neu5Ac2-3(GalNAcβ1-4)Galβ1-4GlcNAcβ-Sp8                                                | 1885 | 97   |
| 245 | Neu5Ac2-6Galβ1-4GlcNAcβ-Sp0                                                            | 1878 | 181  |
| 108 | Galα1-4(Fucα1-2)Galβ1-4GlcNAcβ-Sp8                                                     | 1874 | 218  |
| 180 | Glcβ1-4Glcβ-Sp8                                                                        | 1854 | 135  |
| 99  | Galα1-3(Fucα1-2)Galβ-Sp8                                                               | 1850 | 37   |
| 243 | Neu5Ac2-6GalNAcβ1-4GlcNAcβ-Sp0                                                         | 1850 | 229  |
| 259 | Neu5Gco2-3Galβ1-4(Fucα1-3)GlcNAcβ-Sp0                                                  | 1845 | 380  |
| 175 | GlcNAcβ1-6GalNAcα-Sp8                                                                  | 1831 | 242  |
| 9   | α-D-Man-Sp8                                                                            | 1807 | 857  |
| 131 | Galβ1-3GlcNAcβ1-3Galβ1-4GlcNAcβ-Sp0                                                    | 1802 | 300  |
| 16  | β-Neu5Ac-Sp8                                                                           | 1796 | 1015 |
| 239 | Neu5Ac2-3Galβ1-4Glcβ-Sp0                                                               | 1790 | 580  |
| 219 | Neu5Ac2-3Galβ1-3(Neu5Ac2-3Galβ1-4)GlcNAcβ-Sp8                                          | 1785 | 688  |
| 262 | Neu5Gco2-6GalNAcα-Sp0                                                                  | 1730 | 269  |
| 215 | Neu5Ac2-3GalNAcβ1-4GlcNAcβ-Sp0                                                         | 1730 | 374  |
| 79  | GalNAcα1-3(Fucα1-2)Galβ1-3GlcNAcβ-Sp0                                                  | 1728 | 620  |
| 171 | (GlcNAcβ1-4)β-Sp8                                                                      | 1725 | 621  |
| 182 | Sorbitol-Sp8                                                                           | 1719 | 589  |
| 208 | Neu5Ac2-3(6-O-Su)Galβ1-4(Fucα1-3)GlcNAcβ-Sp8                                           | 1694 | 285  |
| 213 | Neu5Ac2-3(Neu5Ac2-6)GalNAcα-Sp8                                                        | 1678 | 685  |
| 77  | Fucα1-4GlcNAcβ-Sp8                                                                     | 1677 | 892  |
| 84  | GalNAcα1-3(Fucα1-2)Galβ-Sp8                                                            | 1661 | 143  |
| 178 | Glcα1-4Glcα-Sp8                                                                        | 1659 | 936  |
| 68  | Fucα1-2Galβ1-4(Fucα1-3)GlcNAcβ-Sp8                                                     | 1650 | 170  |
| 284 | Neu5Ac2-3Galβ1-3GlcNAcβ1-3Galβ1-3GlcNAcβ-Sp0                                           | 1646 | 1000 |
| 226 | Neu5Ac2-3Galβ1-3GlcNAcβ-Sp8                                                            | 1624 | 443  |
| 52  | Galβ1-4GlcNAcβ1-2Manα1-3(Galβ1-4GlcNAcβ1-2Manα1-6)Manβ1-4GlcNAcβ1-4GlcNAcβ-Gly         | 1617 | 223  |
| 189 | Manα1-2Manα1-2Manα1-3Mano-Sp9                                                          | 1599 | 433  |
| 166 | GlcNAcβ1-3Galβ1-4GlcNAcβ1-3Galβ1-4GlcNAcβ-Sp0                                          | 1595 | 316  |
| 110 | Galα1-4Galβ1-4GlcNAcβ-Sp8                                                              | 1589 | 354  |
| 14  | α-Neu5Ac-Sp8                                                                           | 1587 | 855  |
| 196 | Manα1-3(Manα1-2Manα1-2Manα1-6)Mano-Sp9                                                 | 1573 | 817  |
| 95  | Galα1-3(Fucα1-2)Galβ1-3GlcNAcβ-Sp0                                                     | 1569 | 99   |
| 153 | Galβ1-4GlcNAcβ-Sp8                                                                     | 1555 | 208  |
| 83  | GalNAcα1-3(Fucα1-2)Galβ1-4Glcβ-Sp0                                                     | 1552 | 594  |
| 58  | Fucα1-2Galβ1-3GalNAcα-Sp8                                                              | 1523 | 248  |
| 80  | GalNAcα1-3(Fucα1-2)Galβ1-4(Fucα1-3)GlcNAcβ-Sp0                                         | 1516 | 284  |
| 15  | α-Neu5Ac-Sp11                                                                          | 1509 | 468  |
| 75  | Fucα1-3GlcNAcβ-Sp8                                                                     | 1487 | 450  |
| 183 | GlcAc-Sp8                                                                              | 1455 | 290  |
| 237 | Neu5Ac2-3Galβ1-4GlcNAcβ-Sp8                                                            | 1451 | 776  |
| 199 | Man5_9mix N                                                                            | 1434 | 686  |
| 234 | Neu5Ac2-3Galβ1-4GlcNAcβ1-3Galβ1-4(Fucα1-3)GlcNAc-Sp0                                   | 1397 | 161  |
| 67  | Fucα1-2Galβ1-4(Fucα1-3)GlcNAcβ-Sp0                                                     | 1390 | 632  |
| 70  | Fucα1-2Galβ1-4GlcNAcβ1-3Galβ1-4GlcNAcβ1-3Galβ1-4GlcNAcβ-Sp0                            | 1373 | 217  |
| 59  | Fucα1-2Galβ1-3GalNAcβ1-4(Neu5Ac2-3)Galβ1-4Glcβ-Sp0                                     | 1356 | 196  |
| 66  | Fucα1-2Galβ1-4(Fucα1-3)GlcNAcβ1-3Galβ1-4(Fucα1-3)GlcNAcβ1-3Galβ1-4(Fucα1-3)GlcNAcβ-Sp0 | 1348 | 177  |
| 217 | Neu5Ac2-3Galβ1-3(Fucα1-4)GlcNAcβ-Sp8                                                   | 1338 | 492  |
| 181 | Glcβ1-6Glcβ-Sp8                                                                        | 1327 | 319  |
| 51  | GlcNAcβ1-2Manα1-3(GlcNAcβ1-2Manα1-6)Manβ1-4GlcNAcβ1-4GlcNAcβ-Gly                       | 1318 | 275  |
| 94  | Galα1-2Galβ-Sp8                                                                        | 1315 | 318  |
| 76  | Fucα1-3GlcNAcβ-Sp8                                                                     | 1266 | 703  |
| 223 | Neu5Ac2-3Galβ1-3GalNAcβ1-3Galα1-4Galβ1-4Glcβ-Sp0                                       | 1255 | 468  |
| 187 | KDNα2-3Galβ1-3GlcNAcβ-Sp0                                                              | 1253 | 315  |
| 279 | Galβ1-3GlcNAcβ1-3Galβ1-3GlcNAcβ-Sp0                                                    | 1252 | 443  |
| 221 | Neu5Ac2-3Galβ1-3(Neu5Ac2-6)GalNAcα-Sp8                                                 | 1245 | 590  |
| 21  | β-GlcNAc-Sp0                                                                           | 1243 | 471  |
| 191 | Manα1-2Manα1-3Mano-Sp9                                                                 | 1214 | 663  |
| 97  | Galα1-3(Fucα1-2)Galβ1-4GlcNAc-Sp0                                                      | 1213 | 195  |
| 202 | Neu5Ac2-3Galβ1-3GalNAcα-Sp8                                                            | 1211 | 566  |
| 176 | GlcNAcβ1-6Galβ1-4GlcNAcβ-Sp8                                                           | 1210 | 135  |
| 168 | GlcNAcβ1-4MDPLys                                                                       | 1192 | 533  |
| 212 | Neu5Ac2-3(Neu5Ac2-3Galβ1-3GalNAcβ1-4)Galβ1-4Glcβ-Sp0                                   | 1191 | 147  |
| 188 | KDNα2-3Galβ1-4GlcNAcβ-Sp0                                                              | 1173 | 655  |
| 240 | Neu5Ac2-3Galβ1-4Glcβ-Sp8                                                               | 1165 | 376  |
| 48  | 9-O-AcNeu5NAcα-Sp8                                                                     | 1158 | 587  |
| 144 | Galβ1-4GlcNAcβ1-3GalNAcα-Sp8                                                           | 1147 | 330  |
| 69  | Fucα1-2Galβ1-4GlcNAcβ1-3Galβ1-4GlcNAc-Sp0                                              | 1144 | 470  |
| 264 | Neu5Gcoα-Sp8                                                                           | 1117 | 376  |
| 56  | Fucα1-2Galβ1-3GalNAcβ1-3Galα1-4Galβ1-4Glcβ-Sp9                                         | 1100 | 66   |
| 255 | Neu5Acβ2-6Galβ1-4GlcNAcβ-Sp8                                                           | 1093 | 162  |
| 81  | GalNAcα1-3(Fucα1-2)Galβ1-4GlcNAcβ-Sp0                                                  | 1093 | 144  |
| 192 | Manα1-6(Manα1-2Manα1-3)Manα1-6(Manα2Manα1-3)Manβ1-4GlcNAcβ1-4GlcNAcβ-N                 | 1088 | 366  |
| 285 | Neu5Ac2-3Galβ1-4GlcNAcβ1-3Galβ1-3GlcNAcβ-Sp0                                           | 1074 | 410  |
| 195 | Manα1-3(Manα1-6)Mano-Sp9                                                               | 1067 | 251  |
| 207 | Neu5Ac2-8Neu5Ac2-8Neu5Acα-Sp8                                                          | 1047 | 167  |
| 82  | GalNAcα1-3(Fucα1-2)Galβ1-4GlcNAcβ-Sp8                                                  | 1043 | 231  |
| 257 | Neu5Gco2-3Galβ1-3(Fucα1-4)GlcNAcβ-Sp0                                                  | 1023 | 324  |
| 50  | Manα1-3(Manα1-6)Manβ1-4GlcNAcβ1-4GlcNAcβ-Gly                                           | 1013 | 531  |
| 174 | GlcNAcβ1-6(Galβ1-3)GalNAcα-Sp8                                                         | 1003 | 278  |
| 205 | Neu5Ac2-8Neu5Ac2-8Neu5Ac2-3Galβ1-4Glcβ-Sp0                                             | 993  | 112  |
| 232 | Neu5Ac2-3Galβ1-4(Fucα1-3)GlcNAcβ1-3Galβ-Sp8                                            | 991  | 150  |
| 22  | β-GlcNAc-Sp8                                                                           | 978  | 359  |
| 238 | Neu5Ac2-3Galβ1-4GlcNAcβ1-3Galβ1-4GlcNAcβ-Sp0                                           | 978  | 351  |
| 214 | Neu5Ac2-3GalNAcα-Sp8                                                                   | 955  | 213  |
| 179 | Glcα1-6Glcα1-6Glcβ-Sp8                                                                 | 953  | 272  |
| 194 | Manα1-2Manα1-2Manα1-3(Manα1-2Manα1-6)Manα1-6(Manβ1-4GlcNAcβ14GlcNAcβ-N                 | 942  | 222  |
| 162 | GlcNAcβ1-3Galβ-Sp8                                                                     | 942  | 451  |
| 198 | Manα1-6(Manα1-3)Manα1-6(Manα1-3)Manβ1-4GlcNAcβ1-4GlcNAcβ-N                             | 921  | 304  |
| 159 | GlcNAcβ1-3(GlcNAcβ1-6)GalNAcα-Sp8                                                      | 913  | 359  |
| 252 | Neu5Ac2-8Neu5Acα-Sp8                                                                   | 905  | 466  |
| 225 | Neu5Ac2-3Galβ1-3GlcNAcβ-Sp0                                                            | 889  | 228  |
| 146 | Galβ1-4GlcNAcβ1-3Galβ1-4GlcNAcβ1-3Galβ1-4GlcNAcβ-Sp0                                   | 886  | 31   |
| 283 | Galβ1-4GlcNAcβ1-3Galβ1-3GlcNAcβ-Sp0                                                    | 841  | 200  |
| 165 | GlcNAcβ1-3Galβ1-4GlcNAcβ-Sp8                                                           | 785  | 197  |
| 63  | Fucα1-2Galβ1-3GlcNAcβ-Sp0                                                              | 780  | 269  |
| 71  | Fucα1-2Galβ1-4GlcNAcβ-Sp0                                                              | 759  | 258  |
| 61  | Fucα1-2Galβ1-3GlcNAcβ1-3Galβ1-4Glcβ-Sp10                                               | 759  | 186  |
| 72  | Fucα1-2Galβ1-4GlcNAcβ-Sp8                                                              | 684  | 215  |
| 190 | Manα1-2Manα1-3(Manα1-2Manα1-6)Mano-Sp9                                                 | 660  | 213  |
| 167 | GlcNAcβ1-3Galβ1-4Glcβ-Sp0                                                              | 658  | 75   |
| 88  | GalNAcβ1-3GalNAcα-Sp8                                                                  | 656  | 288  |
| 200 | Manβ1-4GlcNAcβ-Sp0                                                                     | 656  | 173  |
| 170 | GlcNAcβ1-4Galβ1-4GlcNAcβ-Sp8                                                           | 651  | 272  |
| 163 | GlcNAcβ1-3Galβ1-3GalNAcα-Sp8                                                           | 648  | 80   |
| 254 | Neu5Acβ2-6GalNAcα-Sp8                                                                  | 644  | 155  |
| 25  | GlcNAcβ1-3(GlcNAcβ1-4)(GlcNAcβ1-6)GlcNAc-Sp8                                           | 640  | 140  |
| 73  | Fucα1-2Galβ1-4Glcβ-Sp0                                                                 | 637  | 229  |
| 156 | GlcNAcα1-3Galβ1-4GlcNAcβ-Sp8                                                           | 631  | 62   |
| 160 | GlcNAcβ1-3(GlcNAcβ1-6)Galβ1-4GlcNAcβ-Sp8                                               | 623  | 172  |
| 64  | Fucα1-2Galβ1-3GlcNAcβ-Sp8                                                              | 590  | 98   |
| 62  | Fucα1-2Galβ1-3GlcNAcβ1-3Galβ1-4Glcβ-Sp8                                                | 585  | 27   |
| 57  | Fucα1-2Galβ1-3(Fucα1-4)GlcNAcβ-Sp8                                                     | 505  | 86   |
| 236 | Neu5Ac2-3Galβ1-4GlcNAcβ-Sp0                                                            | 502  | 122  |
| 177 | Glcα1-4Glcβ-Sp8                                                                        | 446  | 219  |
| 158 | GlcNAcβ1-2Galβ1-3GalNAcα-Sp8                                                           | 410  | 183  |
| 169 | GlcNAcβ1-4(GlcNAcβ1-6)GalNAcα-Sp8                                                      | 395  | 67   |
| 19  | β-D-Man-Sp8                                                                            | 322  | 93   |
| 161 | GlcNAcβ1-3GalNAcα-Sp8                                                                  | 322  | 164  |













|     |                                                                                                                                                        |     |     |
|-----|--------------------------------------------------------------------------------------------------------------------------------------------------------|-----|-----|
| 401 | Gala1-3Galb1-4GlcNAcb1-3GalNAca-Sp14                                                                                                                   | 125 | 136 |
| 288 | Galb1-4(Fuca1-3)(6S)GlcNAcb-Sp0                                                                                                                        | 125 | 54  |
| 67  | Fuca1-2Galb1-3GlcNAcb-Sp0                                                                                                                              | 124 | 130 |
| 249 | Neu5Aca2-3Galb1-4(6S)GlcNAcb-Sp8                                                                                                                       | 124 | 117 |
| 272 | Neu5Aca2-6Galb-Sp8                                                                                                                                     | 123 | 76  |
| 282 | Neu5Gca2-3Galb1-4Glc-Sp0                                                                                                                               | 123 | 90  |
| 181 | GlcNAcb1-3Galb-Sp8                                                                                                                                     | 122 | 87  |
| 383 | Galb1-4GlcNAcb1-6(Galb1-4GlcNAcb1-2)Mana1-6(Galb1-4GlcNAcb1-4(Galb1-4GlcNAcb1-2)Mana1-3)Manb1-4GlcNAcb1-4GlcNAcb-Sp21                                  | 122 | 51  |
| 496 | Fuca1-2(6S)Galb1-3(6S)GlcNAcb-Sp0                                                                                                                      | 121 | 12  |
| 334 | Neu5Aca2-3Galb1-4(Fuca1-3)GlcNAcb1-6(Neu5Aca2-3Galb1-3)GalNAca-Sp14                                                                                    | 121 | 14  |
| 24  | (3S)Galb1-4(Fuca1-3)(6S)Glc-Sp0                                                                                                                        | 120 | 17  |
| 351 | Galb1-3GlcNAcb1-2Mana1-6(Galb1-3GlcNAcb1-2Mana1-3)Manb1-4GlcNAcb1-4(Fuca1-6)GlcNAcb-Sp22                                                               | 119 | 58  |
| 352 | (6S)GlcNAcb1-3Galb1-4GlcNAcb-Sp0                                                                                                                       | 119 | 87  |
| 450 | GalNAca1-3(Fuca1-2)Galb1-4GlcNAcb1-2Mana1-6(GalNAca1-3(Fuca1-2)Galb1-4GlcNAcb1-2Mana1-3)Manb1-4GlcNAcb1-4(Fuca1-6)GlcNAcb-Sp22                         | 118 | 45  |
| 12  | Galb-Sp8                                                                                                                                               | 116 | 20  |
| 98  | GalNAcb1-4GlcNAcb-Sp0                                                                                                                                  | 116 | 35  |
| 314 | Mana1-2Mana1-6(Mana1-2Mana1-3)Mana1-6(Mana1-2Mana1-2Mana1-3)Mana-Sp9                                                                                   | 116 | 96  |
| 300 | Galb1-4GlcNAcb1-6(Galb1-4GlcNAcb1-3)Galb1-4GlcNAcb-Sp0                                                                                                 | 116 | 34  |
| 414 | GalNAca1-3(Fuca1-2)Galb1-4(Fuca1-3)GlcNAcb1-3GalNAca-Sp14                                                                                              | 116 | 12  |
| 124 | Gala1-6Glc-Sp8                                                                                                                                         | 115 | 62  |
| 194 | GlcNAcb1-6Galb1-4GlcNAcb-Sp8                                                                                                                           | 115 | 29  |
| 418 | Fuca1-2Galb1-3GlcNAcb1-3GalNAca-Sp14                                                                                                                   | 115 | 46  |
| 359 | Fuca1-2Galb1-4(Fuca1-3)GlcNAcb1-2Mana1-6(Fuca1-2Galb1-4(Fuca1-3)GlcNAcb1-2Mana1-3)Manb1-4GlcNAcb1-4GlcNAcb-Sp20                                        | 114 | 48  |
| 529 | Neu5Aca2-3Galb1-4(Fuca1-3)GlcNAcb1-2Mana-Sp0                                                                                                           | 113 | 124 |
| 417 | GlcNAcb1-2(GlcNAcb1-6)Mana1-6(GlcNAcb1-2Mana1-3)Manb1-4GlcNAcb1-4GlcNAcb-Sp19                                                                          | 112 | 57  |
| 366 | Galb1-4GlcNAcb1-2Mana1-6(Galb1-4GlcNAcb1-4(Galb1-4GlcNAcb1-2)Mana1-3)Manb1-4GlcNAcb1-4GlcNAcb-Sp21                                                     | 112 | 130 |
| 92  | GalNAca1-3Galb-Sp8                                                                                                                                     | 111 | 35  |
| 83  | GalNAca1-3(Fuca1-2)Galb1-4(Fuca1-3)GlcNAcb-Sp0                                                                                                         | 110 | 45  |
| 97  | GalNAcb1-4(Fuca1-3)GlcNAcb-Sp0                                                                                                                         | 110 | 15  |
| 108 | Gala1-3(Fuca1-2)Galb-Sp18                                                                                                                              | 110 | 33  |
| 440 | (6S)Galb1-3(6S)GlcNAcb-Sp0                                                                                                                             | 110 | 13  |
| 581 | Galb1-4GlcNAcb1-3Galb1-4GlcNAcb1-6(Galb1-4GlcNAcb1-3Galb1-4GlcNAcb1-3)GalNAca-Sp14                                                                     | 110 | 53  |
| 519 | Galb1-3GlcNAcb1-2Mana-Sp0                                                                                                                              | 108 | 25  |
| 465 | GlcA1-6GlcA1-6GlcA1-6Glc-Sp10                                                                                                                          | 108 | 29  |
| 6   | Fuca-Sp8                                                                                                                                               | 107 | 30  |
| 247 | Fuca1-2(6S)Galb1-4Glc-Sp0                                                                                                                              | 107 | 14  |
| 65  | Fuca1-2Galb1-3GlcNAcb1-3Galb1-4Glc-Sp8                                                                                                                 | 107 | 105 |
| 104 | Gala1-3(Fuca1-2)Galb1-4(Fuca1-3)GlcNAcb-Sp8                                                                                                            | 106 | 22  |
| 285 | Neu5Gca-Sp8                                                                                                                                            | 105 | 66  |
| 224 | Neu5Aca2-3Galb1-3GalNAca-Sp14                                                                                                                          | 105 | 72  |
| 251 | Neu5Aca2-3Galb1-4(Fuca1-3)GlcNAcb1-3Galb1-4(Fuca1-3)GlcNAcb1-3Galb1-4(Fuca1-3)GlcNAcb-Sp0                                                              | 104 | 4   |
| 143 | Galb1-3GalNAcb1-3Gala1-4Galb1-4Glc-Sp0                                                                                                                 | 104 | 111 |
| 407 | Galb1-3GalNAcb1-4(Neu5Aca2-8Neu5Aca2-3)Galb1-4Glc-Sp0                                                                                                  | 103 | 15  |
| 350 | Galb1-4GlcNAcb1-2Mana1-6(Galb1-4GlcNAcb1-2Mana1-3)Manb1-4GlcNAcb1-4(Fuca1-6)GlcNAcb-Sp22                                                               | 103 | 5   |
| 564 | GlcNAcb1-3Galb1-4GlcNAcb1-2Mana1-6(GlcNAcb1-3Galb1-4GlcNAcb1-2Mana1-3)Manb1-4GlcNAcb1-4(Fuca1-6)GlcNAcb-Sp24                                           | 103 | 8   |
| 481 | Neu5Aca2-3Galb1-3GlcNAcb1-2Mana1-6(GlcNAcb1-4)Neu5Aca2-3Galb1-3GlcNAcb1-2Mana1-3)Manb1-4GlcNAcb1-4GlcNAcb-Sp21                                         | 103 | 51  |
| 495 | Fuca1-2Galb1-3(6S)GlcNAcb-Sp0                                                                                                                          | 102 | 28  |
| 508 | (3S)GalNAcb1-4(3S)GlcNAcb-Sp8                                                                                                                          | 102 | 49  |
| 205 | KDNA2-3Galb1-3GlcNAcb-Sp0                                                                                                                              | 102 | 20  |
| 491 | Galb1-4(Fuca1-3)GlcNAcb1-2Mana-Sp0                                                                                                                     | 102 | 37  |
| 484 | Gala1-3Galb1-3GlcNAcb1-6GalNAca-Sp14                                                                                                                   | 101 | 39  |
| 531 | GalNAca1-3(Fuca1-2)Galb1-3GalNAcb1-3Gala1-4Galb1-4Glc-Sp21                                                                                             | 101 | 50  |
| 139 | Galb1-3GalNAca-Sp8                                                                                                                                     | 101 | 52  |
| 180 | GlcNAcb1-3GalNAca-Sp14                                                                                                                                 | 100 | 77  |
| 22  | 6S(3S)Galb1-4(6S)GlcNAcb-Sp0                                                                                                                           | 100 | 16  |
| 192 | GlcNAcb1-6GalNAca-Sp8                                                                                                                                  | 100 | 44  |
| 255 | Neu5Aca2-3Galb1-4(Fuca1-3)GlcNAcb1-3Galb1-4GlcNAcb-Sp8                                                                                                 | 100 | 26  |
| 317 | Galb1-4GlcNAcb1-2Mana1-6(Neu5Aca2-6Galb1-4GlcNAcb1-2Mana1-3)Manb1-4GlcNAcb1-4GlcNAcb-Sp12                                                              | 99  | 39  |
| 463 | Gala1-3(Fuca1-2)Galb1-3GalNAca-Sp8                                                                                                                     | 99  | 60  |
| 525 | GlcNAcb1-3Galb1-4GlcNAcb1-2Mana1-6(GlcNAcb1-3Galb1-4GlcNAcb1-2Mana1-3)Manb1-4GlcNAcb1-4GlcNAcb-Sp25                                                    | 99  | 33  |
| 202 | GlcAb-Sp8                                                                                                                                              | 99  | 31  |
| 278 | Neu5Gca2-3Galb1-3(Fuca1-4)GlcNAcb-Sp0                                                                                                                  | 99  | 29  |
| 357 | Fuca1-2Galb1-3GlcNAcb1-2Mana1-6(Fuca1-2Galb1-3GlcNAcb1-2Mana1-3)Manb1-4GlcNAcb1-4GlcNAcb-Sp20                                                          | 99  | 24  |
| 399 | Gala1-4Galb1-3GlcNAcb1-2Mana1-6(Gala1-4Galb1-3GlcNAcb1-2Mana1-3)Manb1-4GlcNAcb1-4GlcNAcb-Sp19                                                          | 99  | 6   |
| 80  | Fuca1-4GlcNAcb-Sp8                                                                                                                                     | 98  | 71  |
| 320 | Neu5Gcb2-6Galb1-4GlcNAcb-Sp8                                                                                                                           | 98  | 34  |
| 333 | GalNAca1-3(Fuca1-2)Galb1-4GlcNAcb1-3Galb1-4GlcNAcb1-3Galb1-4GlcNAcb-Sp0                                                                                | 97  | 24  |
| 311 | Mana1-6Manb-Sp10                                                                                                                                       | 97  | 24  |
| 54  | Galb1-4GlcNAcb1-2Mana1-6(Galb1-4GlcNAcb1-2Mana1-3)Manb1-4GlcNAcb1-4GlcNAcb-Sp12                                                                        | 97  | 32  |
| 393 | GlcNAcb1-2Mana1-6(Galb1-4GlcNAcb1-2Mana1-3)Manb1-4GlcNAcb1-4GlcNAcb-Sp12                                                                               | 97  | 43  |
| 149 | Galb1-3GlcNAcb-Sp0                                                                                                                                     | 96  | 44  |
| 424 | Galb1-3GlcNAcb1-6(Galb1-3GlcNAcb1-2)Mana1-6(Galb1-3GlcNAcb1-2Mana1-3)Manb1-4GlcNAcb1-4GlcNAcb-Sp19                                                     | 96  | 10  |
| 131 | Galb1-4GlcNAcb1-6GalNAca-Sp8                                                                                                                           | 96  | 28  |
| 433 | Galb1-4GlcNAcb1-6(Galb1-4GlcNAcb1-2)Mana1-6(GlcNAcb1-4)Galb1-4GlcNAcb1-2Mana1-3)Manb1-4GlcNAcb1-4GlcNAcb-Sp21                                          | 96  | 95  |
| 468 | Fuca1-2Galb1-4(Fuca1-3)GlcNAcb1-2Mana1-6(Fuca1-2Galb1-4(Fuca1-3)GlcNAcb1-2Mana1-3)Manb1-4GlcNAcb1-4(Fuca1-6)GlcNAcb-Sp24                               | 95  | 14  |
| 553 | GalNAcb1-4GlcNAcb1-3GalNAcb1-4GlcNAcb-Sp0                                                                                                              | 95  | 8   |
| 444 | Galb1-4GlcNAcb1-2Mana-Sp0                                                                                                                              | 95  | 23  |
| 541 | Galb1-3GlcNAcb1-3Galb1-4GlcNAcb1-2Mana1-6(Galb1-3GlcNAcb1-3Galb1-4GlcNAcb1-2Mana1-3)Manb1-4GlcNAcb1-4GlcNAcb-Sp25                                      | 95  | 25  |
| 3   | Mana-Sp8                                                                                                                                               | 94  | 40  |
| 75  | Fuca1-2Galb1-4GlcNAcb-Sp0                                                                                                                              | 94  | 12  |
| 178 | GlcNAcb1-6(GlcNAcb1-3)Galb1-4GlcNAcb-Sp8                                                                                                               | 94  | 42  |
| 170 | Galb1-4GlcNAcb-Sp23                                                                                                                                    | 94  | 18  |
| 420 | GalNAca1-3(Fuca1-2)Galb1-3GlcNAcb1-3GalNAca-Sp14                                                                                                       | 94  | 10  |
| 15  | GalNAcb-Sp8                                                                                                                                            | 93  | 21  |
| 107 | Gala1-3(Fuca1-2)Galb-Sp8                                                                                                                               | 93  | 11  |
| 168 | Galb1-4GlcNAcb-Sp0                                                                                                                                     | 93  | 22  |
| 262 | Neu5Aca2-3Galb1-4Glc-Sp8                                                                                                                               | 93  | 22  |
| 500 | Fuca1-2Galb1-3GlcNAcb1-6(Fuca1-2Galb1-3GlcNAcb1-3)GalNAca-Sp14                                                                                         | 93  | 28  |
| 362 | Fuca1-4(Galb1-3)GlcNAcb1-2Mana1-6(Fuca1-4(Galb1-3)GlcNAcb1-2Mana1-3)Manb1-4GlcNAcb1-4(Fuca1-6)GlcNAcb-Sp22                                             | 93  | 48  |
| 1   | Gala-Sp8                                                                                                                                               | 93  | 18  |
| 533 | Galb1-3GalNAcb1-3Gal-Sp21                                                                                                                              | 92  | 61  |
| 595 | Neu5Aca2-6Galb1-4GlcNAcb1-3Galb1-4GlcNAcb1-6(Neu5Aca2-6Galb1-4GlcNAcb1-3Galb1-4GlcNAcb1-3)GalNAca-Sp14                                                 | 92  | 38  |
| 557 | Galb1-3GlcNAcb1-6(Galb1-3)GalNAca-Sp14                                                                                                                 | 92  | 23  |
| 52  | GlcNAcb1-2Mana1-6(GlcNAcb1-2Mana1-3)Manb1-4GlcNAcb1-4GlcNAcb-Sp12                                                                                      | 91  | 24  |
| 203 | GlcAb1-3Galb-Sp8                                                                                                                                       | 91  | 65  |
| 77  | Fuca1-2Galb1-4Glc-Sp0                                                                                                                                  | 91  | 18  |
| 477 | Neu5Aca2-6Galb1-4GlcNAcb1-2Mana1-6(Neu5Aca2-6Galb1-4GlcNAcb1-2Mana1-3)Manb1-4GlcNAcb1-4(Fuca1-6)GlcNAcb-Sp24                                           | 91  | 22  |
| 295 | (6S)Galb1-4(6S)GlcNAcb-Sp0                                                                                                                             | 90  | 21  |
| 509 | GalNAcb1-4(6S)GlcNAcb-Sp8                                                                                                                              | 90  | 49  |
| 84  | (3S)Galb1-4(Fuca1-3)Glc-Sp0                                                                                                                            | 90  | 40  |
| 330 | Gala1-4Galb1-4GlcNAcb1-3Galb1-4Glc-Sp0                                                                                                                 | 89  | 21  |
| 538 | GlcNAcb1-3Galb1-4GlcNAcb1-3Galb1-4GlcNAcb1-2Mana1-6(GlcNAcb1-3Galb1-4GlcNAcb1-3Galb1-4GlcNAcb1-2Mana1-3)Manb1-4GlcNAcb1-4GlcNAcb-Sp25                  | 89  | 13  |
| 121 | Gala1-4Galb1-4GlcNAcb-Sp8                                                                                                                              | 88  | 38  |
| 408 | Neu5Aca2-3Galb1-3GalNAcb1-4(Neu5Aca2-8Neu5Aca2-3)Galb1-4Glc-Sp0                                                                                        | 88  | 13  |
| 16  | GlcNAcb-Sp0                                                                                                                                            | 88  | 82  |
| 177 | GlcNAcb1-6(GlcNAcb1-3)GalNAca-Sp14                                                                                                                     | 88  | 55  |
| 446 | Gala1-3(Fuca1-2)Galb1-4GlcNAcb1-6(Gala1-3(Fuca1-2)Galb1-4GlcNAcb1-3)GalNAca-Sp14                                                                       | 87  | 36  |
| 36  | (3S)Galb1-4GlcNAcb-Sp0                                                                                                                                 | 87  | 50  |
| 291 | Galb1-4GlcNAcb1-3Galb1-3GlcNAcb-Sp0                                                                                                                    | 87  | 64  |
| 99  | GalNAcb1-4GlcNAcb-Sp8                                                                                                                                  | 86  | 24  |
| 312 | Mana1-6(Mana1-3)Mana1-6(Mana1-3)Manb-Sp10                                                                                                              | 86  | 25  |
| 423 | Gala1-3(Fuca1-2)Galb1-4GlcNAcb1-2Mana1-6(Gala1-3(Fuca1-2)Galb1-4GlcNAcb1-2Mana1-3)Manb1-4GlcNAcb1-4(Fuca1-6)GlcNAcb-Sp22                               | 86  | 12  |
| 114 | Gala1-3Galb1-3GlcNAcb-Sp0                                                                                                                              | 86  | 87  |
| 493 | Gala1-3(Fuca1-2)Galb1-4GlcNAcb1-6GalNAca-Sp14                                                                                                          | 86  | 33  |
| 199 | GlcAb1-6Glc-Sp8                                                                                                                                        | 85  | 23  |
| 163 | Galb1-4GlcNAcb1-3Galb1-4GlcNAcb-Sp0                                                                                                                    | 85  | 15  |
| 596 | Neu5Aca2-6Galb1-4GlcNAcb1-3Galb1-4GlcNAcb1-3Galb1-4GlcNAcb1-2Mana1-6(Neu5Aca2-6Galb1-4GlcNAcb1-3Galb1-4GlcNAcb1-2Mana1-3)Manb1-4GlcNAcb1-4GlcNAcb-Sp12 | 85  | 83  |
| 329 | Neu5Aca2-6Galb1-4GlcNAcb1-3Galb1-4GlcNAcb1-3Galb1-4GlcNAcb-Sp0                                                                                         | 84  | 21  |
| 513 | (6P)Galb1-4GlcNAcb-Sp0                                                                                                                                 | 84  | 83  |
| 91  | GalNAca1-3GalNAcb-Sp8                                                                                                                                  | 84  | 48  |
| 239 | Neu5Aca2-3Galb1-3(Fuca1-4)GlcNAcb1-3Galb1-4(Fuca1-3)GlcNAcb-Sp0                                                                                        | 84  | 10  |
| 79  | Fuca1-3GlcNAcb-Sp8                                                                                                                                     | 83  | 64  |
| 96  | GalNAcb1-3Gala1-4Galb1-4GlcNAcb-Sp0                                                                                                                    | 83  | 20  |
| 390 | Gala1-3Galb1-3GlcNAcb1-2Mana1-6(Gala1-3Galb1-3GlcNAcb1-2Mana1-3)Manb1-4GlcNAcb1-4GlcNAcb-Sp19                                                          | 83  | 8   |
| 195 | GlcA1-4Glc-Sp8                                                                                                                                         | 83  | 26  |
| 517 | Gala1-3(Fuca1-2)Galb1-4GlcNAcb1-2Mana-Sp0                                                                                                              | 83  | 42  |

|     |                                                                                                                                                                                          |    |    |
|-----|------------------------------------------------------------------------------------------------------------------------------------------------------------------------------------------|----|----|
| 179 | GlcNAcb1-3GalNAca-Sp8                                                                                                                                                                    | 82 | 11 |
| 275 | Galb1-3(Fuca1-4)GlcNAcb1-3Galb1-3(Fuca1-4)GlcNAcb-Sp0                                                                                                                                    | 82 | 52 |
| 279 | Neu5Gca2-3Galb1-3GlcNAcb-Sp0                                                                                                                                                             | 82 | 12 |
| 451 | Galb1-3(Fuca1-2)Galb1-3GlcNAcb1-2Mana1-6(Gala1-3(Fuca1-2)Galb1-3GlcNAcb1-2Mana1-3)Manb1-4GlcNAcb1-4(Fuca1-6)GlcNAcb-Sp22                                                                 | 82 | 9  |
| 551 | GlcNAcb1-3Galb1-4GlcNAcb1-6(GlcNAcb1-3Galb1-3)GalNAca-Sp14                                                                                                                               | 82 | 33 |
| 441 | Fuca1-2Galb1-4GlcNAcb1-2Mana1-6(Fuca1-2Galb1-4GlcNAcb1-2)Manb1-4GlcNAcb1-4GlcNAcb-Sp12                                                                                                   | 82 | 11 |
| 222 | Fuca1-2(6S)Galb1-4(6S)Glc-Sp0                                                                                                                                                            | 82 | 21 |
| 370 | GalNAca1-3(Fuca1-2)Galb1-3GlcNAcb1-2Mana1-6(GalNAca1-3(Fuca1-2)Galb1-3GlcNAcb1-2Mana1-3)Manb1-4GlcNAcb1-4GlcNAcb-Sp20                                                                    | 82 | 48 |
| 125 | Galb1-2Galb-Sp8                                                                                                                                                                          | 82 | 10 |
| 214 | Mana1-2Mana1-2Mana1-6(Mana1-3)Mana-Sp9                                                                                                                                                   | 81 | 17 |
| 340 | GlcNAca1-4Galb1-4GlcNAcb1-3Galb1-4GlcNAcb-Sp0                                                                                                                                            | 81 | 50 |
| 590 | Neu5Aca2-3Galb1-4GlcNAcb1-3Galb1-4GlcNAcb1-6(Galb1-3)GalNAca-Sp14                                                                                                                        | 81 | 26 |
| 145 | Galb1-3GalNAcb1-4Galb1-4Glc-Sp8                                                                                                                                                          | 81 | 9  |
| 466 | Glc1-4Glc1-4Glc1-4Glc-Sp10                                                                                                                                                               | 81 | 38 |
| 600 | Galb1-3GalNAcb1-4(Neu5Aca2-8Neu5Aca2-8Neu5Aca2-3)Galb1-4Glc-Sp21                                                                                                                         | 81 | 42 |
| 281 | Neu5Gca2-3Galb1-4GlcNAcb-Sp0                                                                                                                                                             | 80 | 31 |
| 105 | Gala1-3(Fuca1-2)Galb1-4GlcNAcb-Sp0                                                                                                                                                       | 80 | 25 |
| 328 | Neu5Aca2-3Galb1-3(Fuca1-4)GlcNAcb1-3Galb1-3(Fuca1-4)GlcNAcb-Sp0                                                                                                                          | 80 | 60 |
| 29  | (3S)Galb1-3GalNAca-Sp8                                                                                                                                                                   | 79 | 40 |
| 102 | Gala1-3(Fuca1-2)Galb1-3GlcNAcb-Sp8                                                                                                                                                       | 79 | 14 |
| 335 | GlcNAca1-4Galb1-4GlcNAcb1-3Galb1-4GlcNAcb1-3Galb1-4GlcNAcb-Sp0                                                                                                                           | 79 | 40 |
| 532 | Gala1-3(Fuca1-2)Galb1-3GalNAcb1-3Gala1-4Galb1-4Glc-Sp21                                                                                                                                  | 79 | 18 |
| 172 | Galb1-4Glc-Sp8                                                                                                                                                                           | 79 | 17 |
| 216 | Mana1-6(Mana1-3)Mana1-6(Mana1-3)Manb1-4GlcNAcb1-4GlcNAcb-Sp12                                                                                                                            | 79 | 19 |
| 368 | Gala1-3(Fuca1-2)Galb1-4GlcNAcb1-2Mana1-6(Gala1-3(Fuca1-2)Galb1-4GlcNAcb1-2Mana1-3)Manb1-4GlcNAcb1-4GlcNAcb-Sp0                                                                           | 79 | 17 |
| 434 | Galb1-4GlcNAcb1-6(Galb1-4GlcNAcb1-2)Mana1-6(GlcNAcb1-4)Galb1-4GlcNAcb1-4(Galb1-4GlcNAcb1-2)Mana1-3)Manb1-4GlcNAcb1-4GlcNAcb-Sp21                                                         | 79 | 8  |
| 206 | KDNa2-3Galb1-4GlcNAcb-Sp0                                                                                                                                                                | 78 | 14 |
| 470 | GlcNAcb1-6(GlcNAcb1-2)Mana1-6(GlcNAcb1-2)Manb1-4GlcNAcb1-4(Fuca1-6)GlcNAcb-Sp24                                                                                                          | 78 | 2  |
| 182 | GlcNAcb1-3Galb1-4GlcNAcb-Sp0                                                                                                                                                             | 78 | 69 |
| 198 | Glc1-4Glc-Sp8                                                                                                                                                                            | 78 | 11 |
| 146 | Galb1-3Galb-Sp8                                                                                                                                                                          | 77 | 31 |
| 426 | Fuca1-3GlcNAcb1-6(Galb1-4GlcNAcb1-3)Galb1-4Glc-Sp21                                                                                                                                      | 77 | 20 |
| 506 | (6S)4S)GalNAcb1-4GlcNAcb-Sp8                                                                                                                                                             | 77 | 20 |
| 598 | Neu5Aca2-6Galb1-4GlcNAcb1-3Galb1-4GlcNAcb1-2Mana1-6(Neu5Aca2-6Galb1-4GlcNAcb1-3Galb1-4GlcNAcb1-2Mana1-3)Manb1-4GlcNAcb1-4GlcNAcb-Sp12                                                    | 77 | 13 |
| 101 | Galb1-3(Fuca1-2)Galb1-3GlcNAcb-Sp0                                                                                                                                                       | 77 | 74 |
| 543 | Neu5Aca2-8Neu5Gca2-3Galb1-4GlcNAcb-Sp0                                                                                                                                                   | 77 | 45 |
| 209 | Mana1-2Mana1-3Mana-Sp9                                                                                                                                                                   | 76 | 26 |
| 488 | Galb1-4(Fuca1-3)GlcNAcb1-6(Neu5Aca2-6(Neu5Aca2-3Galb1-3)GlcNAcb1-3)Galb1-4Glc-Sp21                                                                                                       | 76 | 17 |
| 498 | GalNAca1-4(Fuca1-3)(6S)GlcNAcb-Sp8                                                                                                                                                       | 76 | 20 |
| 296 | (6P)Glc-Sp10                                                                                                                                                                             | 75 | 25 |
| 211 | Mana1-2Mana1-6(Mana1-3)Mana1-6(Mana1-2Mana1-2Mana1-3)Manb1-4GlcNAcb1-4GlcNAcb-Sp12                                                                                                       | 75 | 14 |
| 273 | Neu5Aca2-8Neu5Aca-Sp8                                                                                                                                                                    | 75 | 8  |
| 161 | Galb1-4GlcNAcb1-3Galb1-4(Fuca1-3)GlcNAcb1-3Galb1-4(Fuca1-3)GlcNAcb-Sp0                                                                                                                   | 75 | 40 |
| 512 | Galb1-4(6P)GlcNAcb-Sp0                                                                                                                                                                   | 75 | 13 |
| 10  | Neu5Aca-Sp11                                                                                                                                                                             | 74 | 12 |
| 47  | (6S)GlcNAcb-Sp8                                                                                                                                                                          | 74 | 29 |
| 59  | Fuca1-2Galb1-3GalNAcb1-3Gala1-4Galb1-4Glc-Sp9                                                                                                                                            | 74 | 41 |
| 190 | GlcNAcb1-4GlcNAcb1-4GlcNAcb1-4GlcNAcb1-4GlcNAcb1-Sp8                                                                                                                                     | 74 | 37 |
| 257 | Neu5Aca2-3Galb1-4GlcNAcb-Sp0                                                                                                                                                             | 74 | 4  |
| 283 | Neu5Gca2-6GalNAca-Sp0                                                                                                                                                                    | 74 | 10 |
| 321 | Galb1-3GlcNAcb1-2Mana1-6(Galb1-3GlcNAcb1-2Mana1-3)Manb1-4GlcNAcb1-4GlcNAcb-Sp19                                                                                                          | 74 | 18 |
| 354 | KDNa2-6Galb1-4GlcNAcb-Sp0                                                                                                                                                                | 74 | 19 |
| 219 | (3S)Galb1-4(Fuca1-3)(6S)GlcNAcb-Sp8                                                                                                                                                      | 74 | 23 |
| 277 | Neu5Aca2-6Galb1-4GlcNAcb-Sp8                                                                                                                                                             | 74 | 20 |
| 315 | Neu5Aca2-3Galb1-4GlcNAcb1-6(Neu5Aca2-3Galb1-3)GalNAca-Sp14                                                                                                                               | 74 | 23 |
| 271 | Neu5Aca2-6Galb1-4Glc-Sp8                                                                                                                                                                 | 74 | 8  |
| 563 | Neu5Aca2-8Neu5Aca2-3Galb1-3GalNAcb1-4(Neu5Aca2-3)Galb1-4Glc-Sp21                                                                                                                         | 74 | 10 |
| 34  | (3S)Galb1-4(6S)GlcNAcb-Sp0                                                                                                                                                               | 73 | 23 |
| 331 | GalNAcb1-3Gala1-4Galb1-4GlcNAcb1-3Galb1-4Glc-Sp0                                                                                                                                         | 73 | 55 |
| 505 | Galb1-3(6S)GlcNAcb-Sp8                                                                                                                                                                   | 73 | 27 |
| 141 | Galb1-3GalNAca-Sp16                                                                                                                                                                      | 72 | 21 |
| 429 | GlcNAcb1-6(GlcNAcb1-2)Mana1-6(GlcNAcb1-2)Manb1-4GlcNAcb1-4GlcNAcb-Sp21                                                                                                                   | 72 | 17 |
| 30  | (3S)Galb1-3GlcNAcb-Sp0                                                                                                                                                                   | 72 | 16 |
| 69  | Fuca1-2Galb1-4(Fuca1-3)GlcNAcb1-3Galb1-4(Fuca1-3)GlcNAcb-Sp0                                                                                                                             | 72 | 9  |
| 88  | GlcNAcb1-3Galb1-3GalNAca-Sp8                                                                                                                                                             | 72 | 11 |
| 223 | Neu5Aca2-3Galb1-3GalNAca-Sp8                                                                                                                                                             | 72 | 5  |
| 416 | Fuca1-2Galb1-4GlcNAcb1-2Mana1-6(Fuca1-2Galb1-4GlcNAcb1-2Mana1-3)Manb1-4GlcNAcb1-4(Fuca1-6)GlcNAcb-Sp22                                                                                   | 72 | 12 |
| 201 | GlcAa-Sp8                                                                                                                                                                                | 72 | 12 |
| 349 | GlcNAcb1-2Mana1-6(GlcNAcb1-2)Manb1-4GlcNAcb1-4(Fuca1-6)GlcNAcb-Sp22                                                                                                                      | 72 | 18 |
| 469 | Fuca1-2Galb1-3(Fuca1-4)GlcNAcb1-2Mana1-6(Fuca1-2Galb1-3(Fuca1-4)GlcNAcb1-2Mana1-3)Manb1-4GlcNAcb1-4(Fuca1-6)GlcNAcb1-4(Fuca1-6)GlcNAcb-Sp19                                              | 72 | 24 |
| 499 | (3S)GalNAcb1-4(Fuca1-3)GlcNAcb-Sp8                                                                                                                                                       | 72 | 11 |
| 243 | Neu5Aca2-6(Neu5Aca2-3Galb1-3)GalNAca-Sp14                                                                                                                                                | 71 | 6  |
| 369 | Gala1-3Galb1-4(Fuca1-3)GlcNAcb1-2Mana1-6(Gala1-3Galb1-4(Fuca1-3)GlcNAcb1-2Mana1-3)Manb1-4GlcNAcb1-4GlcNAcb-Sp20                                                                          | 71 | 10 |
| 237 | Neu5Aca2-3Galb1-3(6S)GlcNAcb-Sp8                                                                                                                                                         | 71 | 20 |
| 503 | Galb1-4GlcNAcb1-6(Galb1-4GlcNAcb1-2)Mana1-6(GlcNAcb1-4)Galb1-4GlcNAcb1-4(Galb1-4GlcNAcb1-2)Mana1-3)Manb1-4GlcNAcb1-4(Fuca1-6)GlcNAcb-Sp21                                                | 71 | 21 |
| 266 | Neu5Aca2-6Galb1-4GlcNAcb-Sp0                                                                                                                                                             | 71 | 10 |
| 82  | GalNAca1-3(Fuca1-2)Galb1-3GlcNAcb-Sp0                                                                                                                                                    | 70 | 31 |
| 152 | Galb1-4(Fuca1-3)GlcNAcb-Sp8                                                                                                                                                              | 70 | 81 |
| 452 | Neu5Aca2-6Galb1-4GlcNAcb1-6(Fuca1-2Galb1-3GlcNAcb1-3)Galb1-4Glc-Sp21                                                                                                                     | 70 | 33 |
| 70  | Fuca1-2Galb1-4(Fuca1-3)GlcNAcb1-3Galb1-4(Fuca1-3)GlcNAcb1-3Galb1-4(Fuca1-3)GlcNAcb-Sp0                                                                                                   | 69 | 12 |
| 156 | Galb1-4(6S)Glc-Sp8                                                                                                                                                                       | 69 | 13 |
| 189 | GlcNAcb1-4GlcNAcb1-4GlcNAcb1-4GlcNAcb1-4GlcNAcb1-4GlcNAcb1-Sp8                                                                                                                           | 69 | 12 |
| 212 | Mana1-2Mana1-6(Mana1-4)GlcNAcb1-2Mana1-3)Manb1-4GlcNAcb1-4GlcNAcb-Sp12                                                                                                                   | 69 | 6  |
| 241 | Neu5Aca2-3Galb1-3(6S)GalNAca-Sp8                                                                                                                                                         | 69 | 59 |
| 341 | GlcNAca1-4Galb1-3GalNAca-Sp14                                                                                                                                                            | 69 | 9  |
| 486 | Neu5Aca2-3Galb1-3GlcNAcb1-6GalNAca-Sp14                                                                                                                                                  | 69 | 31 |
| 492 | Fuca1-2(6S)Galb1-3GlcNAcb-Sp0                                                                                                                                                            | 69 | 9  |
| 554 | GlcNAcb1-3Galb1-4GlcNAcb1-3Galb1-4GlcNAcb1-3Galb1-4GlcNAcb1-2Mana1-6(GlcNAcb1-3Galb1-4GlcNAcb1-3Galb1-4GlcNAcb1-3Galb1-4GlcNAcb1-3Galb1-4GlcNAcb1-2Mana1-3)Manb1-4GlcNAcb1-4GlcNAcb-Sp25 | 69 | 9  |
| 382 | Galb1-3GlcNAcb1-3Galb1-4(Fuca1-3)GlcNAcb1-6(Galb1-3GlcNAcb1-3)Galb1-4Glc-Sp21                                                                                                            | 69 | 67 |
| 49  | Neu5,9Ac2a2-6Galb1-4GlcNAcb-Sp8                                                                                                                                                          | 69 | 54 |
| 318 | Neu5Aca2-8Neu5Acb-Sp17                                                                                                                                                                   | 68 | 10 |
| 346 | Galb1-4GlcNAcb1-2Mana1-3Manb1-4GlcNAcb1-4GlcNAcb-Sp12                                                                                                                                    | 68 | 55 |
| 536 | Fuca1-2Galb1-4GlcNAcb1-3Galb1-4GlcNAcb1-2Mana1-6(Fuca1-2Galb1-4GlcNAcb1-3Galb1-4GlcNAcb1-2Mana1-3)Manb1-4GlcNAcb1-4GlcNAcb-Sp24                                                          | 68 | 14 |
| 567 | Galb1-4GlcNAcb1-3Galb1-4GlcNAcb1-3Galb1-4GlcNAcb1-2Mana1-6(Galb1-4GlcNAcb1-3Galb1-4GlcNAcb1-3Galb1-4GlcNAcb1-2Mana1-3)Manb1-4GlcNAcb1-4(Fuca1-6)GlcNAcb-Sp24                             | 68 | 11 |
| 63  | Fuca1-2Galb1-3GalNAcb1-4(Neu5Aca2-3)Galb1-4Glc-Sp0                                                                                                                                       | 68 | 31 |
| 324 | Galb1-4(Fuca1-3)GlcNAcb1-2Mana1-6(Galb1-4(Fuca1-3)GlcNAcb1-2Mana1-3)Manb1-4GlcNAcb1-4GlcNAcb-Sp20                                                                                        | 68 | 9  |
| 217 | Manb1-4GlcNAcb-Sp0                                                                                                                                                                       | 68 | 6  |
| 364 | Neu5Aca2-6GlcNAcb1-4GlcNAcb1-4GlcNAcb-Sp21                                                                                                                                               | 68 | 15 |
| 438 | GalNAcb1-6GalNAcb-Sp8                                                                                                                                                                    | 67 | 14 |
| 494 | Fuca1-2Galb1-4GlcNAcb1-2Mana-Sp0                                                                                                                                                         | 67 | 11 |
| 367 | GalNAca1-3(Fuca1-2)Galb1-4GlcNAcb1-2Mana1-6(GalNAca1-3(Fuca1-2)Galb1-4GlcNAcb1-2Mana1-3)Manb1-4GlcNAcb1-4GlcNAcb-Sp20                                                                    | 67 | 20 |
| 478 | Neu5Aca2-3Galb1-4GlcNAcb1-2Mana1-6(Neu5Aca2-3Galb1-4GlcNAcb1-2Mana1-3)Manb1-4GlcNAcb1-4(Fuca1-6)GlcNAcb-Sp24                                                                             | 67 | 16 |
| 489 | Fuca1-2Galb1-4GlcNAcb1-6GalNAca-Sp14                                                                                                                                                     | 67 | 9  |
| 37  | (3S)Galb1-4GlcNAcb-Sp8                                                                                                                                                                   | 67 | 26 |
| 135 | Neu5Aca2-6(Galb1-3)GalNAca-Sp8                                                                                                                                                           | 67 | 27 |
| 213 | Mana1-6(Mana1-3)Mana-Sp9                                                                                                                                                                 | 67 | 17 |
| 61  | Fuca1-2Galb1-3GalNAca-Sp8                                                                                                                                                                | 67 | 39 |
| 372 | Neu5Aca2-3Galb1-4GlcNAcb1-3GalNAca-Sp14                                                                                                                                                  | 67 | 49 |
| 188 | GlcNAcb1-4Galb1-4GlcNAcb-Sp8                                                                                                                                                             | 66 | 7  |
| 427 | GlcNAcb1-2Mana1-6(GlcNAcb1-4)GlcNAcb1-2Mana1-3)Manb1-4GlcNAcb1-4GlcNAcb-Sp21                                                                                                             | 66 | 8  |
| 38  | (3S)Galb-Sp8                                                                                                                                                                             | 66 | 41 |
| 55  | Neu5Aca2-6Galb1-4GlcNAcb1-2Mana1-6(Neu5Aca2-6Galb1-4GlcNAcb1-2Mana1-3)Manb1-4GlcNAcb1-4GlcNAcb-Sp12                                                                                      | 66 | 19 |
| 298 | Galb1-3Galb1-4GlcNAcb-Sp8                                                                                                                                                                | 65 | 22 |
| 14  | Manb-Sp8                                                                                                                                                                                 | 65 | 25 |
| 289 | Galb1-4(Fuca1-3)(6S)Glc-Sp0                                                                                                                                                              | 65 | 11 |
| 422 | Fuca1-2Galb1-3GlcNAcb1-2Mana1-6(Fuca1-2Galb1-3GlcNAcb1-2Mana1-3)Manb1-4GlcNAcb1-4(Fuca1-6)GlcNAcb-Sp22                                                                                   | 65 | 19 |
| 497 | Neu5Aca2-6GalNAcb1-4(6S)GlcNAcb-Sp8                                                                                                                                                      | 65 | 61 |
| 337 | GlcNAca1-4Galb1-3GlcNAcb-Sp0                                                                                                                                                             | 65 | 19 |
| 487 | (3S)Galb1-3(Fuca1-4)GlcNAcb-Sp0                                                                                                                                                          | 65 | 9  |
| 507 | (6S)GalNAcb1-4GlcNAcb-Sp8                                                                                                                                                                | 65 | 15 |
| 261 | Neu5Aca2-3Galb1-4Glc-Sp0                                                                                                                                                                 | 64 | 15 |
| 545 | Neu5Gca2-8Neu5Gca2-3Galb1-4GlcNAcb1-3Galb1-4GlcNAcb-Sp0                                                                                                                                  | 64 | 15 |
| 358 | Fuca1-2Galb1-4GlcNAcb1-2Mana1-6(Fuca1-2Galb1-4GlcNAcb1-2Mana1-3)Manb1-4GlcNAcb1-4GlcNAcb-Sp20                                                                                            | 64 | 17 |
| 380 | Galb1-4GlcNAcb1-6(Fuca1-4(Fuca1-2Galb1-3)GlcNAcb1-3)Galb1-4Glc-Sp21                                                                                                                      | 64 | 7  |
| 27  | (3S)Galb1-4(6S)Glc-Sp8                                                                                                                                                                   | 64 | 13 |
| 193 | GlcNAcb1-6GalNAca-Sp14                                                                                                                                                                   | 64 | 9  |
